1 Insights into the microbiota of Asian seabass (*Lates calcarifer*) with tenacibaculosis symptoms  
2 and description of *sp. nov. Tenacibaculum singaporense*

3 Sou Miyake<sup>a</sup>, Melissa Soh<sup>a</sup>, Muhamad Nursyafiq Azman<sup>a</sup>, Si Yan Nghoh<sup>a,e</sup>, László Orbán<sup>a,b,c,f</sup>,  
4 Henning Seedorf<sup>ca,d,#</sup>

5  
6 <sup>a</sup>Temasek Life Sciences Laboratory, 1 Research Link, Singapore 117604, Singapore

7 <sup>b</sup>Department of Animal Sciences, Georgikon Faculty, University of Pannonia, Keszthely, H-  
8 8360 Hungary

9 <sup>c</sup>Centre for Comparative Genomics, Murdoch University, Murdoch, Australia

10 <sup>d</sup>Department of Biological Sciences, National University of Singapore, Singapore 117558,  
11 Singapore

12

13 Current addresses:

14 <sup>e</sup>Marine Aquaculture Center, Agri-Food & Veterinary Authority of Singapore, Republic of  
15 Singapore

16 <sup>f</sup>Frontline Fish Genomics Research Group, Department of Animal Sciences, Georgikon  
17 Faculty, University of Pannonia, Keszthely, Hungary

18

19 <sup>#</sup>Corresponding author: Henning Seedorf, [henning@tll.org.sg](mailto:henning@tll.org.sg)

20 Running title: The microbiota of Asian seabass with tenacibaculosis symptoms

21

22

## 23 Abstract

24 Outbreaks of diseases in farmed fish remain a recurring problem despite the development of  
25 vaccines and improved hygiene standards on aquaculture farms. One commonly observed  
26 bacterial disease in tropical aquaculture of the South-East Asian region is tenacibaculosis,  
27 which is attributed to members of the Bacteroidetes genus *Tenacibaculum*, most notably *T.*  
28 *maritimum*. The impact of tenacibaculosis on fish microbiota remains poorly understood. In  
29 this study, we analysed the microbiota of different tissue types of commercially reared Asian  
30 seabass (*Lates calcarifer*) that showed symptoms of tenacibaculosis and compared the  
31 microbial communities to those of healthy and experimentally infected fish that were exposed  
32 to diseased farm fish. The microbiota of diseased farm fish was dominated by Proteobacteria  
33 (relative abundance $\pm$ standard deviation, 74.5% $\pm$ 22.8%) and Bacteroidetes (18.07% $\pm$ 21.7%),  
34 the latter mainly comprised by a high abundance of *Tenacibaculum* species (17.6% $\pm$ 20.7%).  
35 In healthy seabass Proteobacteria had also highest relative abundance (48.04% $\pm$ 0.02%), but  
36 Firmicutes (34.2% $\pm$ 0.02%) and Fusobacteria (12.0% $\pm$ 0.03%) were the next two major  
37 constituents. Experimentally infected fish developed lesions characteristic for tenacibaculosis,  
38 but the microbiota was primarily dominated by Proteobacteria (90.4% $\pm$ 0.2%) and Firmicutes  
39 (6.2% $\pm$ 0.1%). The relative abundance of *Tenacibaculum* species in experimentally infected  
40 fish was significantly lower than in the commercially reared diseased fish and revealed a higher  
41 prevalence of different *Tenacibaculum* species. One strain was isolated and is described here  
42 as *sp. nov. Tenacibaculum singaporense* TLL-A1<sup>T</sup> (=DSM 106434<sup>T</sup>, KCTC 62393<sup>T</sup>). The  
43 genome of *T. singaporense* was sequenced and compared to those of *T. maritimum* DSM  
44 17995<sup>T</sup> and the newly sequenced *T. mesophilum* DSM 13764<sup>T</sup>.

45

46

## 47 **Importance**

48 Fish production from aquaculture facility has become a major source of protein for human  
49 consumption and is expected to further grow to meet the growing demands. Devastating fish  
50 diseases, such as tenacibaculosis, can eradicate entire stocks of aquaculture fish in a short time  
51 and pose a serious threat to individual fish farmers and overall fish production. Understanding  
52 the disease processes and the individual microbial players involved has the potential to develop  
53 methods to prevent or mitigate infections on aquaculture farms. This study provides important  
54 insights into the microbial ecology of tenacibaculosis from an aquaculture facility in Singapore  
55 and highlights the complexity of this fish disease at two different disease stages. Furthermore,  
56 the isolation of a novel *Tenacibaculum* species and comparative genome analysis of three  
57 different *Tenacibaculum* species enhance our view of this economically and environmentally  
58 important bacterial genus.

59

## 60 **Introduction**

61 The importance of aquaculture fish as food stock has grown rapidly in recent decades as the  
62 amount of wild-caught fish plateaued, while the human world population continues to grow (1,  
63 2). Several technological advances have helped to operate aquaculture facilities in a more  
64 sustainable way, both environmentally and economically. For example, different types of water  
65 treatments have improved hygiene standards on aquaculture farms and the development of  
66 vaccines reduced the number of disease outbreaks in crowded and often genetically uniform  
67 farm fish populations (3, 4). Nonetheless, fish disease outbreaks still occur in high frequency.  
68 One notable disease example is tenacibaculosis. The disease is characterized by lesions on body  
69 surfaces and causes high mortality rates of fish at aquaculture farms (5). The etiological agent

70 of tenacibaculosis was originally isolated from black sea bream (*Acanthopagrus schlegeli*) and  
71 was later identified to be the Gram-negative bacterium *Tenacibaculum maritimum* (6).

72 Since the initial discovery of *T. maritimum*, several other *Tenacibaculum* species have been  
73 isolated from different sources around the world, which led to an expansion of the genus to  
74 more than 30 different species (5, 7-14). Many of the newly isolated species have been found  
75 in association with other marine hosts, such as fish and their eggs (e.g. *T. soleae*, *T. ovolyticum*)  
76 (13, 15), sponges (*T. mesophilum*) (15) and algae (*T. amylolyticum*) (15), but there are also  
77 reports that *Tenacibaculum* species may be reaching high relative abundances in water samples  
78 (8, 12, 16). However, a comprehensive global survey of the genus *Tenacibaculum* has not been  
79 performed thus far. Therefore, certain regions of the world may currently be underrepresented,  
80 such as aquaculture facilities in Southeast Asia, despite their significance for the region. It is  
81 currently therefore difficult to assess if some of the *Tenacibaculum* species are specific to a  
82 host or a geographic region (as some of the species epithets may also suggest (8, 9)).

83 While diagnostic tools for the detection of *T. maritimum* and other *Tenacibaculum* species have  
84 been developed (17), it remains relatively poorly understood how the disease process  
85 progresses mechanistically at molecular level. Some indications come from the recently  
86 sequenced genome of *T. maritimum*, which revealed that the genome encodes a type IX  
87 secretion system (18), that has been discovered only recently and have thus far only been  
88 detected in the phylum Bacteroidetes. This translocation machinery has been shown in other  
89 Bacteroidetes species, e.g. the human oral pathogen *Porphyromonas gingivalis*, to be involved  
90 in virulence factor secretion, but could also be required for gliding motility (19). However,  
91 exact functions of the type IX secretion system and prevalence in *Tenacibaculum* species as  
92 well of how it contributes to the infection process are currently not fully understood.

93 Another aspect that has received relatively little attention is the involvement of the commensal  
94 fish microbiota in the infection process. It has been shown that animals harbour complex  
95 microbial communities on their body surfaces and in the intestinal tract (20-23). These  
96 microorganisms not only impact on host physiology, but they may also act as barrier that  
97 prevents colonization and infection of pathogenic microorganisms. It is currently not well  
98 established how the composition of the fish microbiota (in different tissue types of the fish)  
99 changes during tenacibaculosis under non-laboratory conditions, e.g. in fish on aquaculture  
100 farms, and how different tissue types are affected.

101 Here we provide insights into the microbiota of different tissue types of Asian seabass (*Lates*  
102 *calcarifer*) that are affected by tenacibaculosis. Specifically, we looked into the microbiome of  
103 four different organ types (gut, skin, kidney and brain) from tenacibaculosis-infected farmed  
104 fish and experimentally infected fish and compared them to those of healthy fish. Furthermore,  
105 we describe a novel *Tenacibaculum* species, *Tenacibaculum singaporense* that was isolated  
106 from experimentally infected fish. *T. singaporense* is characterized, its genome is sequenced  
107 and assembled, and the genome annotation compared to *T. maritimum* and the newly sequenced  
108 *T. mesophilum* genomes. This study provides novel insights into the microbial ecology of  
109 tenacibaculosis and the genomic variability of the genus *Tenacibaculum*.

## 110 **Results**

### 111 **Disease transmission from farm to experimental fish**

112 Tenacibaculosis infected dead fish collected from a local farm were used as inoculum to  
113 transmit a tenacibaculosis phenotype to healthy fish in an experimental laboratory tank.  
114 Symptoms of the experimentally infected fish included characteristic lesions and necrosis of  
115 the various parts of the skin, rotten fins, as well as partially opaque eyes. Additionally, there  
116 were clear differences in the weight (two-samples Wilcoxon test,  $W = 189$ ,  $p < 0.05$ ) and the

117 total length of the fish (two-samples Wilcoxon test,  $W = 189$ ,  $p < 0.05$ ) between the  
118 experimentally infected ( $2.30 \pm 0.69\text{g}$ ;  $56.41 \pm 4.56\text{mm}$ ) and healthy control tanks ( $5.83 \pm$   
119  $1.11\text{g}$ ;  $77.14 \pm 4.05\text{mm}$ ) at 30 days post-treatment (dpt) when the fishes were sacrificed,  
120 indicating abnormal growth is also a trait shared by tenacibaculosis infested Asian seabass.  
121 Weight and total length of individual fish are summarized in Table S1.

## 122 **Adjustment of sequencing approach and sequencing results**

123 Initially, the primer pair 515FB-806RB, which is widely used as part of the earth microbiome  
124 project, was used to amplify and sequence the samples of this study. It was found, however,  
125 that  $86.2 \pm 25.9\%$  of the sequencing reads were assigned to the 18S rRNA gene of the host  
126 *Lates calcarifer*. The V1-V2 region of 16S RNA gene (27f-338r) was therefore tested and no  
127 detectable amplification of host DNA was found. Internal organs aside from gut (i.e., brain,  
128 kidney, head kidney and spleen) could not be sampled from the diseased farmed fish due to  
129 severe degradation. Additionally, many sampled tissue types did not yield sufficient bacterial  
130 DNA for amplicon sequencing, especially from the healthy fish. Only gut samples could be  
131 sequenced from all three treatments (diseased farm, experimentally infected and healthy  
132 control fish), while skin samples worked only from the infected fish (i.e. diseased farm and  
133 experimentally infected fish). Although some kidney and brain samples produced results from  
134 experimentally infected fish, this was not the case for head kidney and spleen which did not  
135 yield significant bacterial DNA in neither experimentally infected nor healthy control samples  
136 (see Table S1 for a summary of the samples that amplicon sequencing could be conducted and  
137 their most abundant phyla). In total, 51 samples were successfully sequenced, yielding  
138 6,360,213 high-quality, non-chimeric sequences across all samples (Table S1). In total,  
139 214,720 bacterial operational taxonomic units (OTUs) clustered at 97% pairwise sequence  
140 identity were identified.

## 141 **Richness and alpha diversity of bacterial communities**

142 Overall, the mean observed number of OTUs was significantly higher in the control samples  
143 (5,754) compared to diseased farm fish (5,490) or experimentally infected fish (3,667),  
144 although both diseased farm fish and experimentally infected fish displayed great variation  
145 amongst individuals (SD=1,437, 2,166 and 2,390, respectively) (Kruskal-Wallis rank sum test,  
146  $\chi^2 = 12.03$ ,  $p < 0.05$ ) (Table S1 for individual alpha diversity values). In terms of different  
147 tissue types, higher number of OTUs were found in the gut ( $4,991 \pm 2,322$ ) than skin ( $4,787 \pm$   
148  $1,950$ ), kidney ( $3,508 \pm 3,378$ ) and brain ( $2,568 \pm 932$ ), although these differences were not  
149 statistically significant (Kruskal-Wallis rank sum test,  $\chi^2 = 7.39$ ,  $p = 0.06$ ). A similar pattern  
150 was also detected for the Chao1 index (Kruskal-Wallis rank sum test,  $\chi^2 = 8.50$ ,  $p < 0.05$ ). The  
151 clearest difference between the treatments was detected in the Shannon index (Figure 1). The  
152 control fish showed a significantly higher diversity ( $6.05 \pm 0.10$ ) than both diseased farm fish  
153 ( $2.60 \pm 0.57$ ) and experimentally infected fish ( $2.76 \pm 1.21$ ), although a few samples (~3) from  
154 experimentally infected fish also possessed similarly high indices (Kruskal-Wallis rank sum  
155 test,  $\chi^2 = 17.44$ ,  $p < 0.05$ ).

## 156 **Taxonomic composition of microbiota in healthy and diseased fish**

157 An in-depth taxonomic analysis indicated that strong differences between the three different  
158 groups could be observed at the phylum level. Microbiota samples from the gut – the only  
159 organ from which amplification was consistently possible across treatments – of control fish  
160 contained higher proportion of Proteobacteria ( $48.7 \pm 2.7$  %) and Firmicutes ( $33.3 \pm 0.03$ %),  
161 while diseased farm fish and experimentally infected fish were mostly dominated by  
162 Proteobacteria ( $87.0 \pm 15.2$ % and  $83.1 \pm 21.0$ % respectively; see also Figure 2A for details).  
163 At the genus level, the highly abundant Proteobacteria in the control fish gut was mostly  
164 *Photobacterium* ( $19.4 \pm 3.1$ %), while the dominant Proteobacteria in diseased farm fish and

165 experimentally infected fish were *Vibrio* ( $57.3 \pm 22.7\%$ ) and *Photobacterium* ( $15.8 \pm 11.7\%$ ),  
166 or *Vibrio* ( $31.4 \pm 28.7\%$ ) and *Cohaesibacter* ( $16.2 \pm 24.8\%$ ), respectively (Figure 2B; see Table  
167 S2A and S2B for full taxonomic abundance at phylum and genus level).

168 The skin microbiome of diseased farm fish and experimentally infected fish microbiome were  
169 dominated by Proteobacteria and Bacteroidetes ( $69.3 \pm 22.4\%$ ,  $25.4 \pm 20.3\%$ ); or  
170 Proteobacteria ( $94.3 \pm 5.5\%$ ), respectively. At genus level, the differences became more  
171 apparent, with diseased farm fish skin dominated by *Vibrio* ( $58.0 \pm 20.4\%$ ) and *Tenacibaculum*  
172 ( $24.8 \pm 19.9\%$ ), while experimentally infected fish skins were dominated by *Vibrio* ( $61.7 \pm$   
173  $21.1\%$ ) and *Cohaesibacter* ( $26.3 \pm 23.8\%$ ). Interestingly, the abundance of *Tenacibaculum* in  
174 the experimentally infected fish skin was relatively low ( $0.4 \pm 0.9\%$ ). Amplification of  
175 microbial 16S rRNA genes was not possible from skin samples of healthy fish.

176 Amplicons of microbial 16S rRNA genes were also obtained for brain and kidney samples  
177 from experimentally infected fish. Both were dominated by *Vibrio* (Proteobacteria;  $58.8 \pm$   
178  $31.0\%$  and  $61.2 \pm 32.1\%$  respectively), although half of brain samples did not contain sufficient  
179 bacterial DNA for PCR. The abundance of *Tenacibaculum* was extremely low for both tissue  
180 types ( $0.7 \pm 0.8\%$  and  $0.1 \pm 0.2\%$ , respectively).

### 181 **Beta-diversity analysis reveals differences between diseased and healthy fish.**

182 The apparent difference in the taxonomic composition between the treatments were further  
183 confirmed by beta-diversity analysis. Principal coordinates analysis (PCoA) of Bray-Curtis  
184 dissimilarities was performed to determine if differences in microbiota structure between  
185 samples from healthy control, experimentally infected and diseased farm fish exist. Although  
186 some experimentally infected fish samples clustered together with control samples, most  
187 samples clustered according to different treatments, and to less extent, organs (Figure 3). Both  
188 axis 1 (representing 33.3% of variation) and 2 (20.7%) separated the treatments. Additionally,



189 an ordination plot of the OTUs at 97% cutoff show distribution of the major OTUs amongst  
190 the axis – the three major phyla siding with the three experimental conditions (Figure S1). The  
191 difference in the microbiome between the treatments were statistically supported by ANOSIM  
192 ( $P < 0.05$ ), as well as the probabilistic modeling to cluster microbial communities into  
193 metacommunities by Dirichlet Multinomial Mixtures method (24). The optimum clustering of  
194 the samples was three, which can be best explained by the sample treatments.

195 Given the strong clustering based on the treatment, we further identified the OTUs responsible  
196 for this via LEfSe (Table S3). In total, 365 OTUs were identified to be significantly influencing  
197 the clustering, with 43, 32 and 290 OTUs enriched in experimentally infected fish, diseased  
198 farm fish and healthy control fish samples, respectively. The experimentally infected fish  
199 samples were strongly driven by *Vibrio* OTUs, with five out of the seven most abundant OTUs  
200 (OTUs with overall relative abundance  $> 1\%$ ) classified as *Vibrio*, while the other two were  
201 *Cohaesibacter*. Although *Vibrio* OTUs were also prominent driver in diseased farm fish  
202 samples (four out of seven OTUs over total relative abundance  $>1\%$  were *Vibrio*),  
203 *Tenacibaculum*, *Photobacterium* and *Arcobacter* were also identified as significant  
204 discriminants. *Tenacibaculum* OTU in particular was highly abundant (8.9% of total  
205 abundance). In contrast, all of OTUs enriched in healthy control samples were below 1% in  
206 total relative abundance, perhaps owing to the lower number of samples. Nevertheless, OTUs  
207 enriched in them were more diverse, consisting of unclassified Rhodobacteraceae,  
208 *Photobacterium*, *Paracoccus*, *Lactococcus*, unclassified Fusobacteriales, *Peptostreptococcus*,  
209 *Anthococcus* and *Leuconostoc*.

#### 210 **Prevalence of *Tenacibaculum* OTUs in different treatments.**

211 The five most prevalent *Tenacibaculum* OTUs were picked out from each treatment (diseased  
212 farm, experimentally infected and healthy control fish) and placed into the 16S rRNA

213 phylogenetic tree (Figure 4). This revealed that abundant OTUs between the treatments  
214 differed. Diseased farm fish possessed diverse *Tenacibaculum* OTUs, with those closest to *T.*  
215 *maritimum* (16.99% of total abundance), *T. lutimaris* (0.61%), *T. skagerrakense* (0.18%), *T.*  
216 *litopenaei* (0.09%) and *T. litoreum* (0.04%). For experimentally infected fish, the three most  
217 abundant OTUs were phylogenetically related to *T. singaporense* DSM 106434 (0.191, 0.004,  
218 0.002%), while the other two were closest to *T. mesophilum* (0.124%) and *T. maritimum*  
219 (0.003%). The healthy control fish had the lowest relative abundance of *Tenacibaculum* OTUs,  
220 with those related to *T. singaporense* (0.01%), *T. dicentrarchi* (0.006%), *T. maritimum*  
221 (0.003%) and *T. finnmarkense* (0.001%) being the most abundant.

#### 222 **Isolation and characterization of *Tenacibaculum singaporense* DSM 106434**

223 Experimentally infected fish skin displayed lesions characteristic for tenacibaculosis, but the  
224 relative abundance of *T. maritimum* in the analyzed samples was very low ( $0.4 \pm 0.9\%$ ,  
225 compared to  $24.8 \pm 19.9\%$  in diseased farmed fish skin). However, the analysis revealed the  
226 presence of other *Tenacibaculum* OTUs in the experimentally infected fish that could  
227 contribute to the disease phenotype. We therefore aimed to isolate the bacteria present in the  
228 skin lesion of experimentally infected fish, and one of the obtained isolates showed high  
229 sequence identity to the *Tenacibaculum* OTUs with the higher relative abundance. The strain  
230 was named *Tenacibaculum singaporense* due to the geographical origin of the isolate (see  
231 below for more details on species description). Analysis of the 16S rRNA gene and whole  
232 genome phylogeny both showed that *T. singaporense* DSM 106434 is most closely related to  
233 *T. mesophilum*, and is phylogenetically distinct from *T. maritimum* that is associated with  
234 tenacibaculosis (Figures 4 and 5). The 16S rRNA gene of *T. singaporense* shares 94.5%  
235 sequence identity with *T. maritimum* and 98.7% with *T. mesophilum*. Given the similarity of  
236 *T. singaporense* and *T. mesophilum* at 16S rRNA gene level, genome-wide average nucleotide  
237 identity (ANI) was used to determine the species delineation (25). Two-way ANI from 9,697

238 fragments were 92.07%, well below 95-96% threshold used for species delineation. This was  
239 supported by genome sequence-based delineation (GGDC) (26), that showed that the  
240 probability that DNA-DNA hybridization would be over 70% (i.e., same species) is a mere  
241 9.5% (via logistic regression).

#### 242 **Phenotypic characterisation of *T. singaporense* DSM 106434**

243 Analyses of general phenotypic features and growth characteristics, including temperature  
244 range and colony morphology, of *T. singaporense* DSM 106434 were performed in comparison  
245 with *T. adriaticum* DSM 18961, *T. discolour* DSM 18842, *T. maritimum* DSM 17995 and *T.*  
246 *mesophilum* DSM 13764 (for detailed results see Tables S4). The following test were  
247 performed by DSMZ: analysis of presence of polar lipids, respiratory quinones, cellular fatty  
248 acids, flexirubin. The following lipid groups were identified in the strain: lipid (L), glycolipid  
249 (GL), aminolipid (AL), phosphatidylethanolamine (PE) (Figure S2). Analysis of respiratory  
250 quinones revealed the presence of menaquinone MK6. Results of cellular fatty acid analysis  
251 showed significant proportions of branched-chain and hydroxylated fatty acids (Table S5).  
252 Negative test result for the presence of flexirubin indicated that *T. singaporense* does not  
253 produce flexirubin.

254 The ability of *T. singaporense* to utilise casamino acids, N-acetylglucosamine, sucrose, D-  
255 ribose, DL-aspartate, L-proline, L-glutamate, hydrolysis of starch, hydrolysis of gelatine, and  
256 hydrolysis of chitin was also tested. Casamino acids and hydrolysis of gelatine are the only two  
257 of the ten carbon sources found to be used by *T. singaporense*.

258 Substrate utilisation and substrate derived acid production were tested using API CHE and API  
259 50CH kits (bioMérieux, Craponne France). *T. singaporense* DSM 106434<sup>T</sup> did not show any  
260 reaction with either of the test strips. Results of the API ZYM test kit and the API 20NE test  
261 kit are shown in Tables S6 and S7, respectively. Analysis of antibiotic susceptibility indicated

262 that growth of *T. singaporense* DSM 106434<sup>T</sup> was not inhibited by oxacillin, gentamycin,  
263 amikacin, colistin, pipemidic acid, bacitracin, polymyxin B, kanamycin, neomycin,  
264 fosfomycin, and nystatin (see Table S8 for the antibiotic test results).

### 265 **Assembly and analysis of the *T. singaporense* and *T. mesophilum* genomes**

266 The genome of the isolated *T. singaporense* DSM 106434<sup>T</sup> as well as that of the *T. mesophilum*  
267 type strain DSM 13764<sup>T</sup> was sequenced for further analysis. HGAP 4 assembled reads from  
268 PacBio RSII sequencing were further error corrected with MiSeq reads using Pilon software,  
269 which only corrected for 9 locations totalling 11 bases. Pilon assembly of *T. singaporense* DSM  
270 106434 yielded a single contig for a total assembly size of  
271 3,511,704 base pairs, with G+C content of 32.0%, N50 of 3,511,704 and average coverage of  
272 115x across the genome. No plasmid was identified. The genome has an estimated  
273 completeness of 99.66% and contamination of 0.67% based on 548 marker genes conserved in  
274 Flavobacteriaceae as identified by checkM. The assembly contained 3,204 coding sequences  
275 (CDS); of which 61 were RNAs (8 rRNA and 53 tRNA genes) and 40 repeat regions. This  
276 amounted to 1,840 (57.4%) proteins with assigned putative function and 1,364 hypothetical  
277 proteins. 2,149 proteins were assigned as FIGfam (see Table S9 for the summary of genome  
278 statistics). All annotations are publicly available online under SUB4555753 or in PATRIC ID  
279 104267.16.

280 Similarly, the Pilon assembly of *T. mesophilum* DSM13764 also yielded a single contig for a  
281 total assembly size of 3,344,078 base pairs, with G+C content of 31.8%, N50 of 3,344,078 and  
282 an average coverage of 208x across the genome. No plasmid was identified. As was the case  
283 for the *T. singaporense* DSM 106434 genome, Pilon only corrected for 8 locations totalling 8  
284 bases. The genome has an estimated completeness of 100% and contamination of 0.61% based  
285 on 457 marker genes conserved in Flavobacteriaceae as identified by checkM. The assembly

286 contained 3,044 CDS; of which 66 were RNAs (10 rRNA and 56 tRNA genes) and 52 repeat  
287 regions. This amounted to 1,821 (59.8%) proteins with assigned putative function and 1,223  
288 hypothetical proteins. 2,123 proteins were assigned as FIGfam (Table S9). All annotations are  
289 publicly available online under SUB4565149 or in PATRIC ID 104268.12.

### 290 **Metabolic potential of *T. singaporense* DSM 106434 and *T. mesophilum* DSM13764**

291 The central metabolism of *T. singaporense* and *T. mesophilum* DSM13764 is similar to *T.*  
292 *maritimum* whose metabolic potential has been previously reported (27). Briefly, the genomes  
293 possess complete set of genes for glycolytic (Embden-Meyerhof-Parnas) and pentose  
294 phosphate pathways, TCA cycle, as well as NADH-dehydrogenase, cytochrome C oxidase and  
295 ATP synthase (for the list of enzymes, see Table S10). Additionally, genes for copper-  
296 containing nitrogen reductase are present, which share 99% sequence identity at amino acid  
297 level between the two genomes.

298 Carbohydrate Active EnZymes (CAZymes) are involved in the synthesis, breakdown and  
299 transport of the carbohydrates. They are classified into glycoside hydrolases (GHs), glycosyl  
300 transferases (GTs), polysaccharide lyases (PLs), carbohydrate esterases (CEs), auxiliary  
301 activities (AAs) as well as carbohydrate-binding modules (CBMs). Based on predictions, the  
302 *T. singaporense* DSM 106434 genome harbors genes for 41 CAZymes, which were identified  
303 as 24 GTs, ten GHs, four CEs, one CBM, one PL and one AA (Table S11A). Of 24 GTs found,  
304 GT2 was the most abundant (nine), followed by GT4 (five) and GT51 (three). GT2 includes  
305 enzymes with chitin synthase, mannosyl and glucosyl transferase activity, which may be  
306 involved in the synthesis of chitin and glycosylation of proteins. GT4 are enzymes involved in  
307 sucrose and mannose synthesis. GT51 are murein polymerases. In terms of GHs, aside from  
308 unclassified GH0 (three), most were lysozyme or chitinase related enzymes (GH23, three;  
309 GH18, one; GH73, one).

310 Similarly, the *T. mesophilum* DSM13764 genome encodes for 36 CAZymes, which can be  
311 further broken down into 20 GTs, nine GHs, six CE and one AA (Table S11B). Further GTs  
312 breakdown into family followed similar pattern to that of *T. singaporense* DSM 106434, where  
313 GT2 was the most common (seven), followed by GH4 (five) and G51 (three). However, unlike  
314 in case of *T. singaporense* DSM 106434, there was no clear pattern in GH family classification,  
315 with two GH23 and 1 GH113 (both lysozymes), and one each of GH3 ( $\beta$ -glucosidase), GH5  
316 (endo- $\beta$ -1,4-glucanase/cellulase), GH20 ( $\beta$ -hexosaminidase), GH73 ( $\beta$ -mannanase)  
317 represented.

### 318 **Predicted virulence potential of *T. singaporense* DSM 106434**

319 Initial RASTtk annotation within PATRIC did not identify any potential pathogenic feature  
320 within the *T. singaporense* DSM 106434 genome, and so we conducted BLASTp searches of  
321 the *T. singaporense* DSM 106434 genome against Virulence Factor Database (VFDB) core  
322 dataset identified 109 significant alignments, which were classified into major virulence factors  
323 (Table S12). The most common were toxin formation and iron uptake (both 22.9%), followed  
324 by defense (including anti-phagocytosis, immune evasion and antimicrobial activity; 18.3%).  
325 Of the toxin formation genes, many were encoding potential hemolysins, which destroy the  
326 cell membrane of the host red blood cells. For iron uptake, many were iron transporters and  
327 peptide synthase, along with some acinetobactin biosynthesis genes were identified. Adherence  
328 (12.8%, mostly in the form of minor curlin and internalin, but also including biofilm  
329 formation), stress protein (9.2%), regulation (3.7%) and motility (2.8%) were also found. Less  
330 common (and thus classified as others) included secretion system, intracellular survival  
331 mechanism and enzymes.

332 In terms of the organism these factors were found in, many of the hits were from *Pseudomonas*  
333 *aeruginosa* PAO1 (17.4%) and *Haemophilus influenzae* Rd KW20 (14.7%). Those originating

334 from the former included iron uptake, adherence and anti-phagocytosis genes, while the latter  
335 were toxin, immune evasion and iron uptake genes. We could not determine whether the  
336 apparent bias in the origin of virulence factor was from horizontal gene transfer (HGT) as  
337 opposed to simply a bias in the database or the genomes of those in the database. Given the  
338 possibility of HGTs in acquiring the virulence factors, we further investigated the genome  
339 island present in the *T. singaporense* DSM 106434<sup>T</sup> genome (Figure S3). There were nine  
340 major genomic islands identified by at least two methods (Integrated, Island-Path-DIMOB and  
341 SIGI-HMM), with the largest one spanning 85,087bp.

### 342 **Type IX Secretion System**

343 Secretion systems (SS) are important for pathogens as means of delivering virulence factors.  
344 One type 9 secretion system (T9SS) has recently been discovered in the genome of *T.*  
345 *maritimum* (see (19) for details). Homologues of all major components (*porP-porK-porL-*  
346 *porM-porN*) have also been found in *T. singaporense* DSM 106434 and *T. mesophilum* DSM  
347 13764 though not in operon structure as described for some *Bacteroidetes*. The *porP* gene was  
348 used as an example to highlight the differences in genomic context between different  
349 *Tenacibaculum* species (Figure 6). In *T. maritimum*, four homologues of *porP* genes have been  
350 found, with *ompA* and putative adhesion genes directly flanking the gene in all four instances.  
351 OmpA is a conserved protein domain common in pathogenic bacteria that may act as porin. In  
352 comparison, *T. singaporense* DSM 106434 and *T. mesophilum* DSM13764 have *omp16*  
353 persecutor and internalin / T1SS secreted agglutinin RTX upstream or downstream of the gene,  
354 with *motB* and *tonB* in close proximity as well. MotB is a protein associated with motility,  
355 while TonB plays a role in heme utilization, both are often associated with virulence factors.

356

357 ***Comparative analysis of T. singaporense DSM 106434 with T. mesophilum DSM13764 and***  
358 ***T. maritimum genomes***

359 Circular display representation of the *T. singaporense* DSM 106434 and *T. mesophilum* DSM  
360 13764 genomes against the *T. maritimum* DSM 17995 genome was used to illustrates the  
361 similarity between the three different genomes (Figure 7A). An in-depth analysis of the genome  
362 content revealed that *T. singaporense* DSM 106434 contained 3,160 proteins, 2,511 COGs and  
363 560 singletons, of which a core of 1,776 COGs were conserved in *T. mesophilum* DSM13764  
364 and *T. maritimum* (Figure 7B). BLASTp analysis of species-specific COGs indicated that most  
365 are representing hypothetical proteins with no known function in all three. Interestingly, both  
366 *T. singaporense* DSM 106434 and *T. mesophilum* DSM13764 possessed unique TonB-  
367 dependent receptor SusC, which is a transport mechanism between outer membrane and  
368 periplasm, often found in *Bacteroides*. TonB homologues have been found in vicinity of the  
369 *porP* gene, an important component of T9SS, as described earlier. Additionally, *T.*  
370 *singaporense* DSM 106434 possessed homologue of T9SS C-terminal target domain-  
371 containing protein from *Tenacibaculum sp.* 4G03.

372 **Discussion**

373 This study had two main aims. First, the microbiota composition of diseased farm fish with  
374 tenacibaculosis symptoms and of healthy Asian seabass was analysed to characterize the  
375 disease-specific configuration of the microbiota; Second, a lab-based pathogen challenge was  
376 performed by exposing healthy fish to diseased farm fish in order obtain insights into the  
377 horizontal transmission process of tenacibaculosis-causing microorganisms. For the generation  
378 of data and interpretation of the results it was also important to take the geographic location  
379 and the host species for the experiments into account as there is only limited information on



380 the microbial ecology of Asian seabass grown in aquaculture facilities of Singapore and its  
381 whole geographical region.

### 382 **Technical considerations for the analysis of Asian seabass microbiota**

383 The initial approach of this study to analyse the Asian seabass microbiota relied on the use of  
384 primers 515FB and 806RB recommended by the earth microbiome project. These primers have  
385 been widely used in many different habitats and are known to have relatively little bias against  
386 specific taxa (28). However, it was found in this study that this primer pair mainly amplified a  
387 region of the fish ITS1 gene and that only low numbers of amplicon sequencing reads could be  
388 assigned to microbial taxa, making it necessary to use a different primer pair. The 27f/338r  
389 primer pair used in this study is known to be biased against some taxa, e.g. *Bifidobacteria* (29),  
390 but has also been used widely in microbiome studies, it was sufficient for this study to detect  
391 the suspected pathogens and to provide insights into the diversity of the Asian seabass  
392 microbiome. The increasing interest to analyse fish microbiota may make it necessary to further  
393 optimize the required technical approaches. This could include approaches to reduce the  
394 concentration and/or amplification of host DNA in the samples or additional modifications of  
395 primers, such as the use of blocking primers (30). Considering that fish are the most abundant  
396 group of vertebrates with an estimate of more than 34,000 different species (31), it may  
397 currently be a difficult task to develop a universal approach that works for many or all species  
398 of fish.

### 399 **Differences in microbiota composition between healthy fish, diseased farm fish and** 400 **experimentally infected fish**

401 The alpha- and beta-diversity analysis did reveal strong differences in microbiota composition  
402 between healthy and diseased fish, but also between the diseased farm fish and the  
403 experimentally infected fish. Although skin is the most obvious site of infection, the difference

404 in the microbiome was pronounced in the internal organs as well. In general, healthy fishes  
405 harboured more diverse gut microbial communities in terms of richness and evenness. Some  
406 of the detected phyla, e.g. Fusobacteria and Firmicutes, appeared to have only low relative  
407 abundances in both groups of the diseased fish, indicating that these phyla might be part of an  
408 eubiotic configuration of the healthy Asian seabass microbiota. Fusobacteria and Firmicutes  
409 have also been detected in significant numbers in the microbiota of other healthy fishes,  
410 including zebrafish (32-34) Atlantic salmon (35) and surgeonfishes (36). It may therefore be  
411 worthwhile exploring the presence and abundance of these microorganisms as biomarkers for  
412 the fish health status in other species as well. This is corroborated by LEfSe analysis where  
413 certain OTUs (that belong to Fusobacteria and Firmicutes) are enriched exclusively in the  
414 healthy control samples, as well as correlation analysis which showed that these OTUs are  
415 negatively correlated with those that are associated with the disease (i.e. *Tenacibaculum* and  
416 *Vibrio*). It remains to be seen if the difference observed here in the gut microbiota between the  
417 healthy and diseased fish is a direct effect of pathogenesis, or a secondary effect due to the poor  
418 health state of the fish. As Fusobacteria are considered obligate anaerobes (37), it may also be  
419 tempting to speculate, whether their absence could be due to disease-induced changes in gut  
420 physiology that favour facultative anaerobes or that inhibit strict anaerobes.

421 In contrast to the gut – where the microbiota was richer in the healthy compared to the diseased  
422 – no bacterial marker genes could be amplified from the healthy skin, but from skin of diseased  
423 fish, as expected. The lesions of the diseased skin harbored a wide range of bacterial taxa that  
424 are potentially pathogenic in nature. Diseased farm fish microbiota revealed a high relative  
425 abundance of *Tenacibaculum maritimum* OTUs in samples from fish skin samples. This  
426 supports the hypothesis that *T. maritimum* is also the etiological agent of tenacibaculosis in the  
427 collected Asian seabass samples as it has also been shown for other fish species in different  
428 locations around the world (5). *Photobacterium* and *Vibrio* species also reached high relative

429 abundances (or even higher than *T. maritimum*) in these samples. Both genera are known to  
430 harbor also some species that are known fish pathogens (38-40) and may have contributed to  
431 the disease progression. However, in the case of *Photobacterium* it should be noted that this  
432 genus is also highly abundant in the healthy control fish that do not reveal any obvious signs  
433 of disease.

434 Diseased farm fish and the experimentally infected fish showed similar disease symptoms and  
435 a transmission of the potential pathogens, in particular *Tenacibaculum* species, from diseased  
436 farm fish to experimentally infected fish appeared to be the likely cause. However, the  
437 microbiome composition of experimentally infected fish differed (for most samples) strongly  
438 from the diseased farm fish. Experimentally infected fish harboured only a low abundance of  
439 *Tenacibaculum* species and were instead mostly dominated by species of the phylum  
440 Proteobacteria, most notably *Cohaesibacter* and *Vibrio* species. These observed microbiome  
441 differences between the diseased farm fish and the experimentally infected fish raise the  
442 question for the underlying cause. Several factors can be envisioned. First, the conditions on  
443 the fish farm vary considerably from those in the laboratory. It is known that environmental  
444 conditions may affect the composition of the fish microbiota and could therefore also influence  
445 transmission of microorganisms from one group to another (41). Second, the microbiota  
446 analysis indicates the presence of several other genera with high relative abundance in diseased  
447 fish. Therefore, the possibility that some other microorganisms present (i.e. other than  
448 *Tenacibaculum* species) may cause a phenotype similar to that of tenacibaculosis (or could  
449 have a contributing role) cannot be entirely ruled out. Especially also as tenacibaculosis consist  
450 of wide range of symptoms including lesions, frayed fins, tail rot, mouth rot, and can affect  
451 multiple fish hosts (42-45). Third, the minimal microbial number of *T. maritimum* cells  
452 required to cause tenacibaculosis symptoms in Asian seabass is not well established. The  
453 relative abundance of *T. maritimum* in the tissues of experimentally infected fish is nearly 30-

454 fold lower than in diseased farm fish, but depending on threshold (and the absolute numbers)  
455 this may still be sufficient to cause the disease. A diagnostic PCR protocol developed  
456 specifically for detection of *T. maritimum* (17) did produce positive results for experimentally  
457 infected and diseased farm fish skin (data not shown), indicating a substantial colonization  
458 level with *T. maritimum*. Fourth, it has to be taken into account that fish were sampled at  
459 different stages of the disease and differences in microbiota composition between these two  
460 groups may simply mirror different successional stages of the disease. This could also be  
461 supported by the finding that some tissue samples, e.g. gut samples of the experimentally  
462 infected fish, share higher similarity with the healthy control samples (i.e. not yet affected by  
463 the disease due to its early stage), while all diseased farm fish samples clustered with each  
464 other, regardless of tissue type, indicating that the infection is in a late systemic stage.  
465 Combinations of these four factors or other influences may also have contributed to the  
466 microbiome difference, but will require additional investigations.

467 ***T. singaporense* as a novel representative of the genus *Tenacibaculum* and potential**  
468 **contribution of this species to tenacibaculosis**

469 The analysis of the microbiota of the experimentally infected fish and subsequent cultivation  
470 experiments lead to the detection and isolation of a novel *Tenacibaculum* species, *T.*  
471 *singaporense*. This is to the authors' knowledge the first description of a *Tenacibaculum*  
472 species from Singaporean waters. However, there are several other species that have been  
473 named after their geographic origin in different regions around the world (8-13, 46). This could  
474 indicate that further species from presently not well investigated areas are yet to be discovered.  
475 Given the high diversity of *Tenacibaculum* clade, it may also be worth investigating whether  
476 certain species or strains are found in higher abundance amongst certain hosts or geographic  
477 regions, and if they display any signs of co-diversification, as observed in other host-associated  
478 microorganisms (47, 48). Interestingly, this study also reveals the presence of other

479 *Tenacibaculum* OTUs (e.g. sharing high sequence identity with *T. dicentrachi* and *T.*  
480 *skagerrakense*) in the samples of healthy and diseased fish. Finding of *T. singaporense*,  
481 together with the finding other *Tenacibaculum* OTUs may indicate that *Tenacibaculum* species  
482 could be part of the normal, healthy seabass microbiota. However, it may also indicate that  
483 tenacibaculosis could be a multi-factorial disease, with different *Tenacibaculum* species and  
484 other bacterial genera potentially influencing the successional pattern of disease progression.  
485 In this line it is also interesting to note that it has been shown in mouse experiments that the  
486 susceptibility to pathogen invasion could be predicted based on the abundance of closely  
487 related species (49), e.g. in the case of seabass it could mean that the presence of *T.*  
488 *singaporense* may increase the susceptibility for a *T. maritimum* invasion, instead of *T.*  
489 *singaporense* being directly pathogenic to fish.

490 Overall, it may turn out to be highly valuable to obtain better insights into the genome content  
491 of *Tenacibaculum* species and the genomic differences between different species. The results  
492 of this study indicate that even *Tenacibaculum* species that are only remotely related (based on  
493 16S rRNA sequence identity), such as *T. maritimum* and *T. singaporense*, share a large amount  
494 of their genome content, and harbour only relatively few unique COGs, but may also differ in  
495 copy numbers of potentially important genes, such as those for type IX secretion system.  
496 Undertaking a pan-genome approach for this economically and ecologically important genus  
497 and individual species within could help to identify features that allow adaptation to geographic  
498 regions and/or to specific hosts.

## 499 **Conclusion**

500 In summary, this study provides insights into the microbiota composition of healthy and  
501 diseased Asian seabass in a Singaporean aquaculture facility and under laboratory conditions,  
502 respectively. The results indicate the presence of a novel *Tenacibaculum* species, *T.*

503 *singaporense*, which may represent a local relative of the well characterized fish pathogen *T.*  
504 *maritimum* and is closely related to *T. mesophilum*. The ecological significance of *T.*  
505 *singaporense* as well as its contributions to the observed disease phenotype remain currently  
506 not well understood and warrant further investigations.

#### 507 **Description of *sp. nov. Tenacibaculum singaporense***

508 *Tenacibaculum singaporense*, L. gen. n. *singaporense* from Singapore, in reference to the  
509 geographic origin of the isolate.

510 Gram-negative, oxidase- and catalase positive, strictly aerobic. Grows at temperatures between  
511 20-45 °C, in a medium containing 1 to 7% sodium chloride, 30% to 100% Himedia synthetic  
512 sea salt medium, and between pH 5 to 9. *T. singaporense* colonies are yellow with an irregular  
513 shape and a spreading edge. *T. singaporense* reduces nitrates and utilizes casamino acids and  
514 gelatine for growth, but does not produce flexirubin. Its GC-content (inferred from the genome  
515 sequence) is 32.01%. *T. singaporense* is TLL-A1 (=DSM 106434<sup>T</sup>, KCTC 62393<sup>T</sup>) was  
516 isolated from lesion of diseased Asian seabass (*Lates calcarifer*) in Singapore.

#### 517 **Material and Methods**

##### 518 **Collection of fish specimens from aquaculture facility**

519 Moribund Asian seabass juveniles (henceforth referred to as ‘fish’ or ‘seabass’) with ca. 5g of  
520 body weight with suspected symptoms of tenacibaculosis, having displayed severe skin lesions,  
521 and rotten tail and dorsal fins were collected at a local commercial aquaculture facility in  
522 Singapore. Images were taken as records. The seabass collected were stored in 80% glycerol  
523 at -80°C until usage in the laboratory for microbial isolation and/or the experimental infection  
524 experiment.

##### 525 **Experimental infection experiment**

526 Healthy Asian seabass juveniles of  $35 \pm 5$ mm standard length (n=530) were obtained from  
527 Marine Aquaculture Centre and quarantined for three days before the start of experiment.  
528 Plastic tanks of 200L volume (Toyogo, Japan) were fitted with a 25 watt aquarium heater  
529 (Eheim, Germany) to maintain water temperature at 29°C and the fishes were fed to satiation  
530 with 80% daily water exchange. Waste water was treated with 10% bleach solution overnight  
531 before discharge. Out of the 530 fishes, 470 were subjected to experimental infection and the  
532 remaining 60 were kept as untreated control. Moribund seabass collected with suspected  
533 tenacibaculosis symptoms (see above) were used as inoculum by adding 15 fishes (either the  
534 whole body or body parts with lesions) into the challenge tank. After inoculation, fish were left  
535 undisturbed for 10 days until the tenacibaculosis symptoms appeared in the treated tank.  
536 Moribund individuals from treated tank were sacrificed humanely by dipping into ice for up to  
537 30 seconds and spiking immediately. All individuals were sacrificed 30 days-post treatment.  
538 Gut, infected skin parts (i.e. lesion), brain, kidney, were collected from 10 fish per treatment  
539 by sterile scalpels, individually placed in sterile vials and flash frozen by liquid nitrogen. Gut  
540 and skin samples were also collected from the diseased farm fish, but other internal organs  
541 (brain, kidney, head kidney and spleen) could not be taken as they were partially degraded. The  
542 samples were stored at -20°C until processed. Experimental procedures in the laboratory were  
543 performed according to the approved IACUC protocol TLL(F)-14-004.

#### 544 **DNA extraction, library preparation for amplicon sequencing**

545 Samples were transferred to sterile screw-cap tubes containing 0.7g zirconium beads, and  
546 200µl of 20% SDS, 282µl Buffer A, 268µl Buffer PM, 550µl phenol/chloroform/ isoamyl  
547 alcohol (25:24:1, pH 8) were added (for details on buffer composition see Rius *et al.* (50). The  
548 pelleted cells were subject to phenol-chloroform-based extraction by Rius *et al.* that combined  
549 mechanical and chemical lysis of cells. The samples were quantified and diluted to 40 ng/µl  
550 per sample and stored in -20 °C for further use.

551 Extracted DNA was processed according to the Earth Microbiome Project  
552 (<http://www.earthmicrobiome.org/protocols-and-standards/16s/>) as described in Thompson et  
553 al (51) except for two points. Firstly, primer pair 27f and 338r spanning hypervariable region  
554 V1-3 was used instead of the designed primer pair (515FB and 806RB). Secondly, a dual-  
555 indexing strategy was used as described by Fadrosch et al. to reduce the number of barcoded  
556 primers required (52). PCR was conducted with QIAGEN Taq MasterMix (CAT NO 201445,  
557 QIAGEN, Germany) in triplicates (plus one negative control per sample) under the condition:  
558 94 °C for 3 mins; 35 cycles of 94 °C for 45 secs, 50 °C for 60 °C, 72 °C for 90 secs; and a final  
559 elongation at 72 °C for 10 mins. The amplicons were quantified with Quant IT Picogreen (CAT  
560 NO P7589, Thermo Fisher Scientific, USA), pooled together in equimolar concentrations and  
561 sequenced at Singapore Centre for Environmental Life Sciences Engineering (SCELSE) at  
562 Nanyang Technological University using Illumina MiSeq paired-end chemistry (251x251bp).  
563 The output raw sequences were analysed with MOTHUR v1.39.1 (53) according to the  
564 standard MiSeq protocol (54). The sequence pairs were merged, de-multiplexed and quality-  
565 filtered accordingly. Visualization of processed data was conducted by R project following  
566 tutorials provided in <https://joey711.github.io/phyloseq/index.html>. Packages used include:  
567 ape (55), dplyr (56), ggdendro (57), ggplot2 (58), ggpubr (59), gplots (60), grid (61), gridExtra  
568 (62), Heatplus (28), pheatmap (63), phyloseq (64), plyr (64), RColorBrewer (65), reshape2  
569 (66), sfsmisc (67), vegan (68) and viridis (29). Difference in the alpha and beta diversity  
570 between treatments / tissue types were tested for significance using Kruskal-Wallis rank sum  
571 test (69) and ANOSIM (70), respectively. Dirichlet Multinomial Mixtures method was used to  
572 determine the optimal number of clustering in our data (24), and linear discriminant analysis  
573 effect size (LEfSe) was used to determine the statistically significantly enriched OTUs from  
574 each treatments (71).

575 **Isolation and cultivation of *Tenacibaculum singaporense***



576 Sterile cotton buds were used to swab infected skin of the fish showing tenacibaculosis  
577 symptoms from the tank experiment and subsequently transferred to marine agar plates  
578 prepared in-house (BD Difco™). The agar plates were incubated at 25°C, and the colonies were  
579 diluted and streaked out onto them three times to ensure their purity. The identity of colonies  
580 was determined by PCR and sequencing of the 16S rRNA gene (27F/1492R) and a single  
581 isolate identified as *Tenacibaculum* was kept for further analysis. The isolate was deposited in  
582 Deutsche Sammlung von Mikroorganismen und Zellkulturen (DSMZ, Braunschweig,  
583 Germany) under strain number DSM 106434<sup>T</sup> and with the Korean Collection for Type  
584 Cultures (KCTC, Jeongeup, Republic of Korea) under strain number KCTC 62393<sup>T</sup>.

585 **Cultivation of *Tenacibaculum adriaticum*, *T. discolor*, *T. maritimum*, *T. mesophilum* and**  
586 ***T. singaporense***

587 *T. adriaticum* DSM 18961<sup>T</sup>, *T. discolor* DSM 18842<sup>T</sup>, *T. mesophilum* DSM 13764<sup>T</sup> and *T.*  
588 *maritimum* DSM 17995<sup>T</sup> were purchased from DSMZ as freeze-dried cultures. *T. discolor*  
589 was maintained in Marine Broth 2216 (BD Diagnostics, Durham, North Carolina, USA) and  
590 incubated in shaking incubator at 25°C, 180rpm. *T. mesophilum*, *T. maritimum*, and *T.*  
591 *singaporensis* were maintained in marine broth (BD Difco™) and incubated in shaking  
592 incubator at 30°C, 200rpm. *T. adriaticum* was maintained in ½ strength marine broth and  
593 incubated in shaking incubator at room temperature, 180rpm. Identity of the strain was  
594 confirmed via sequencing of the 16S rRNA gene before and after completion of the  
595 characterization experiments and extraction of genomic DNA for whole genome sequencing,  
596 respectively.

597 **Phenotypic characterisation of *Tenacibaculum* species**

598 **Gram staining**

599 Gram reactivity *T. singaporense* DSM 106434 was tested using the Gram stain reagents by  
600 crystal violet, Gram's iodine solution, and Gram's safranin solution (Sigma-Aldrich, St. Louis,  
601 Missouri, USA) and decoloriser solution comprised of 1:1 ethanol (Fisher Scientific U.K.  
602 Limited, Leicester, United Kingdom) to acetone (Merck Specialities Private Limited, Mumbai,  
603 India). Protocol used was as described by Sigma-Aldrich Gram Staining Kit.

#### 604 **Growth response of *T. singaporense* DSM 106434 to different cultivation conditions**

605 Growth and salinity experiments were conducted with a base medium of 1/5 Luria-Bertani  
606 medium (LBM), as recommended (15). For every 1L of Himedia artificial sea water salts broth  
607 (modified after (72)), 2g tryptone (Oxoid Ltd., Basingstoke, United Kingdom), 1g yeast extract  
608 (Oxoid Ltd., Basingstoke, United Kingdom) were added. Fifteen grams of Bacto agar (BD  
609 Diagnostics, Durham, NC, USA) was added to five-fold diluted LBM agar, and pH was  
610 adjusted to 7.5 with 5M NaOH (Schedelco, Singapore). The medium was sterilised by  
611 autoclaving for 20 mins at 121°C. To obtain above mentioned Himedia artificial sea salts, the  
612 following were added per every litre of water: 24.6g of sodium chloride (Merck, Hellerup,  
613 Denmark), 0.67g of potassium chloride (Sigma, St. Louis, MO, USA), 1.36g of calcium  
614 chloride dihydrate (Merck, Darmstadt, Germany), 3.07g of anhydrous magnesium sulphate  
615 (Sigma-Aldrich, Tokyo, Japan), 4.66g of magnesium chloride hexahydrate (Sigma-Aldrich,  
616 Munich, Germany), and 0.18g of sodium bicarbonate (Sigma-Aldrich, St. Louis, Missouri,  
617 USA). Final pH at 25°C was adjusted to  $\text{pH}7.5 \pm 0.05$ .

618 Growth response of *T. adriaticum*, *T. discolor*, *T. maritimum*, *T. mesophilum* and *T.*  
619 *singaporense* DSM 106434 to different salinity levels, synthetic sea water concentrations, and  
620 pH values were tested. Growth response to varying salinity was tested in 1/5 LBM broth with  
621 varying NaCl concentrations (1, 3, 5, 7 or 10% (w/v) NaCl); to varying synthetic sea water  
622 concentrations in 1/5 LBM broth with varying Himedia synthetic sea water concentrations (0,

623 10, 30, 50, 70, 100% broth); and to different pH levels in 1/5 LBM broth at pH 3, 5, 7, 9, 10.  
624 Different pH values were obtained by adding 37% fuming hydrochloric acid (Merck,  
625 Darmstadt, Germany) and 4M NaOH (Schedelco, Singapore) as required to 1/5 LBM broth.  
626 For all three tests, two serial overnight cultures were grown in 2.5ml medium with respective  
627 salinity and pH values. The experiments were conducted in triplicates for each species and each  
628 medium composition. Of the second overnight culture, 250µl samples were inoculated into  
629 fresh 2.5ml medium (with the respective test condition). On the fifth day from first inoculation,  
630 samples were checked for growth. Liquid cultures of *T. mesophilum*, and *T. singaporense* DSM  
631 106434 were incubated at 30°C, shaking at 200 rpm.

632 The ability of *T. singaporense* DSM 106434<sup>T</sup> to grow in anaerobic conditions was investigated  
633 on solid medium. 1/5 LBM agar plates were placed in an anaerobic chamber for two days to  
634 become anaerobic. Five µl live cultures were then inoculated onto centre of each agar and  
635 incubated in anaerobic chamber at 24°C.

636 Growth of *T. singaporense* DSM 106434<sup>T</sup> at different temperatures was tested by incubating  
637 each strain on 1/5 LBM agar plates at 4, 20, 30, 37, 40 and 45°C for up to 6 days. Five µl  
638 overnight cultures of each species were used on each agar plate. Three replicates per  
639 temperature condition and species were tested.

640 **Characterization of enzyme activities, substrate utilization, pigments, respiratory**  
641 **quinones and antibiotic susceptibility of *T. singaporense* DSM 106434<sup>T</sup>**

642 Catalase production was determined using 3% H<sub>2</sub>O<sub>2</sub> as previously described (73). Oxidase  
643 production based on N,N-dimethyl-p-phenylenediamine oxalate and α-naphthol (74) was  
644 determined using oxidase test discs from Sigma-Aldrich (Sigma-Aldrich, Bangalore, India).  
645 The following tests for enzymatic activity and substrate utilization of *T. singaporense* DSM  
646 106434 were performed by DSMZ: Growth on casaminoacids, N-acetylglucosamine, sucrose,

647 D-ribose, DL-aspartate, L-prolin, L-glutamate, hydrolysis of starch, hydrolysis of gelatine, and  
648 hydrolysis of chitin), metabolic traits using API 50CH, API CHE, and API ZYM kits. Analysis  
649 of polar lipids, flexirubin test, API 20NE (24 to 48-hour identification of Gram negative non-  
650 Enterobacteriaceae), analysis of respiratory quinones, and analysis of cellular fatty acids.  
651 Antibiotic susceptibility of *T. singaporense* DSM 106434 to 36 antibiotics was also performed  
652 by DSMZ.

### 653 **Extraction of genomic DNA for whole genome sequencing**

654 *T. singaporense* DSM106434 and *T. mesophilum* DSM13764 were grown in liquid medium to  
655 an optical density of 1.80 at a wavelength of 600nm. Five-hundred ml culture per isolate were  
656 centrifuged (Beckman Coulter rotor JA10, 6000g, 20min, 4°C) to pellet the cells out of the  
657 media. Genomic DNA (gDNA) was prepared using two rounds of phenol-chloroform  
658 purification (modified after Sambrook et al. (75)) and stored in -20°C until further use.

659 Ten µg of prepared genomic DNA was purified with AMPure XP magnetic beads and quality  
660 checked with Nano drop and Qubit fluorometer (Invitrogen, Carlsbad, CA, USA) and  
661 subsequently used for PacBio RSII Single Molecule and Illumina MiSeq paired-end  
662 (251x251bp) sequencing at Singapore Centre for Environmental Life Sciences Engineering  
663 (SCELSE) in Nanyang Technological University.

### 664 **Genome assembly**

665 Raw PacBio sequencing reads were *de novo* assembled with SMRT analysis software (via  
666 HGAP 4) with standard parameters, except the estimated genome size was set as 3.44Mb  
667 according to the *T. maritimum* genome available (27). Reads from MiSeq pair-end sequencing  
668 were then used for further error correction using Pilon (76).

669 As an initial quality check step of the assembly, RNAmmer (77) was used to annotate and  
670 verify the RNA genes, of which 16S rRNA gene was further used for phylogenetic tree  
671 construction. In addition, CheckM (78) was used to assess genome completeness, percentage

672 contamination, as well as finding out missing single-copy marker genes. Genomes were  
673 annotated using RAST online (79) and RASTtk (80) through PATRIC (Snyder et al., 2007).  
674 Functional characterization was also performed using PATRIC.

#### 675 **Single-gene and whole-genome phylogenetic analyses**

676 16S rRNA gene and whole genome phylogenies were constructed in order to compare the  
677 evolutionary placement of *Tenacibaculum* strains with the previously published  
678 *Tenacibaculum* sequences. 16S rRNA genes were extracted from the polished genome using  
679 RNAmmer as described earlier, aligned by SINA (81) and phylogeny constructed by RAxML  
680 (82) within ARB (83). Whole genome phylogeny was constructed in PATRIC using conserved  
681 protein sequences via RAxML.

#### 682 **Genome-based species delineation**

683 In order to determine if *T. singaporense* DSM 106434 qualifies to be given new species status,  
684 two independent methods were used that compared its genome with that of the closest known  
685 sequenced type strain, *T. mesophilum* DSM13764, also sequenced in this study. The first  
686 approach is based on genome-wide average nucleotide identity (ANI) using reciprocal best hits  
687 as described previously (25). Typically, genomes are considered to belong to the same species  
688 for ANI values above 95%. The analysis was conducted via online server (84). The second  
689 method is genome sequence-based delineation (GGDC) which performs *in silico* DNA-DNA  
690 hybridization and determines the probability that two genomes belong to the same species  
691 (>70% DNA-DNA hybridization) .

#### 692 **Genome analysis and metabolic reconstruction**

693 Genome annotation, comparison and metabolic construction, was conducted in PATRIC  
694 webserver (85). Presence and absence of major central metabolism genes (i.e. Embden-  
695 Meyerhof-Parnas pathway, citric acid cycle, pentose phosphate pathway, NADH-  
696 dehydrogenase, cytochrome C, cytochrome C oxidase, ATP synthase genes) were checked in

697 both *T. singaporense* DSM 106434<sup>T</sup> and *T. mesophilum* genomes. Carbohydrate-active  
698 enzymes (CAZymes) were annotated via dbCAN2 meta server (86) and the major class of  
699 CAZy checked against the online database (87). Note that only CAZymes identified with >2  
700 methods (out of HMMER (E-Value < 1e-15, coverage > 0.35; <http://hmmer.org/>) (88),  
701 DIAMOND (E-Value < 1e-102) (89) and Hotpep (Frequency > 2.6, Hits > 6) (90) were  
702 considered, as recommended by the authors.

703 In order to determine the potential virulence genes, BLASTp search was conducted on the  
704 genome annotation of *T. singaporense* DSM 106434 against Virulence Factors Database  
705 (VFDB) core database (A) which consists of experimentally verified virulence factors.  
706 Relatively conservative cut-off of E-value <0.01, >70% coverage and >30% identity was used  
707 to determine the significant matches. Potential genomic islands were visualized using  
708 IslandViewer4 (91). Furthermore, given the significance of type IX secretion system, its major  
709 components (porP-porK-porL-porM-porN) were BLAST searched in the genome.  
710 Furthermore, since porP was annotated in *T. maritimum* (GenBank ID: LT634361), we used it  
711 to align the gene against *T. singaporense* DSM 106434 and *T. mesophilum* genomes in  
712 Geneious 8.1 (<http://www.geneious.com>) (92), and the alignment (including genes up- and  
713 downstream) were studied.

#### 714 **Comparative genome analyses**

715 In order to visualise the overall differences between *Tenacibaculum* genomes, BLAST Ring  
716 Image Generator (BRIG) was used to display the genome contiguity, GC content as well as GC  
717 skew and BLAST identity compared to reference *T. maritimum* (strain NCIMB 2154T) (93).  
718 Furthermore, OrthoVenn webserver (94) was used for comparisons and annotation of  
719 orthologous gene clusters between the three genomes. The unique, shared (between two  
720 genomes) and conserved (between all three genomes) Clusters of Orthologous Groups of  
721 proteins (COGs) were further analysed using BLAST.

722 **Accession numbers:**

723 The demultiplexed, pair-matched amplicon sequences are deposited in NCBI SRA under  
724 accession number SUB4555782. The assembled *T. singaporense* DSM 106434 and *T.*  
725 *mesophilum* DSM 13764 genomes were deposited in GenBank under accession numbers  
726 SUB4555753 and SUB4565149, respectively.

727

728 **Acknowledgments**

729 We thank Daniela Moses at SCELSE Singapore for performing the PacBio sequencing, and  
730 Amit Anand and Muhammad Khairillah Bin Nanwi at TLL biocomputing for bioinformatics  
731 support. This work was funded by Temasek Life Sciences Laboratory.

732

733

734

735

736

737

738

739

740

741

742

743 **References**

- 744 1. **Gerland P, Raftery AE, Ševčíková H, Li N, Gu D, Spoorenberg T, Alkema L, Fosdick BK,**  
745 **Chunn J, Lalic N, Bay G, Buettner T, Heilig GK, Wilmoth J.** 2014. World population  
746 stabilization unlikely this century. *Science* **346**:234-237.
- 747 2. **Pulvenis J-F.** 2016. Fisheries Aquaculture Topics, The State of World Fisheries and  
748 Aquaculture (SOFIA) Topics Fact Sheets FAO Fisheries and Aquaculture Department Rome,  
749 Rome.
- 750 3. **Bondad-Reantaso MG, Subasinghe RP, Arthur JR, Ogawa K, Chinabut S, Adlard R, Tan**  
751 **Z, Shariff M.** 2005. Disease and health management in Asian aquaculture. *Veterinary*  
752 *parasitology* **132**:249-272.
- 753 4. **Murray AG, Peeler EJ.** 2005. A framework for understanding the potential for emerging  
754 diseases in aquaculture. *Preventive veterinary medicine* **67**:223-235.
- 755 5. **Avendaño-Herrera R, Toranzo AE, Magariños B.** 2006. Tenacibaculosis infection in marine  
756 fish caused by *Tenacibaculum maritimum*: a review. *Diseases of aquatic organisms* **71**:255-  
757 266.
- 758 6. **MASUMURA K, WAKABAYASHI H.** 1977. An outbreak of gliding bacterial disease in  
759 hatchery-born red seabream (*Pagrus major*) and gilthead (*Acanthopagrus schlegeli*) fry in  
760 Hiroshima. *Fish Pathology* **12**:171-177.
- 761 7. **Fernández-Álvarez C, Santos Y.** 2018. Identification and typing of fish pathogenic species of  
762 the genus *Tenacibaculum*. *Applied microbiology and biotechnology*:1-17.
- 763 8. **Frette L, Jørgensen NO, Irming H, Kroer N.** 2004. *Tenacibaculum skagerrakense* sp. nov.,  
764 a marine bacterium isolated from the pelagic zone in Skagerrak, Denmark. *International journal*  
765 *of systematic and evolutionary microbiology* **54**:519-524.
- 766 9. **Heindl H, Wiese J, Imhoff JF.** 2008. *Tenacibaculum adriaticum* sp. nov., from a bryozoan in  
767 the Adriatic Sea. *International journal of systematic and evolutionary microbiology* **58**:542-  
768 547.



- 769 10. **Kang S-J, Lee S-Y, Lee M-H, Oh T-K, Yoon J-H.** 2012. *Tenacibaculum geojense* sp. nov.,  
770 isolated from seawater. International journal of systematic and evolutionary microbiology  
771 **62**:18-22.
- 772 11. **Li Y, Wei J, Yang C, Lai Q, Chen Z, Li D, Zhang H, Tian Y, Zheng W, Zheng T.** 2013.  
773 *Tenacibaculum xiamenense* sp. nov., an algicidal bacterium isolated from coastal seawater.  
774 International journal of systematic and evolutionary microbiology **63**:3481-3486.
- 775 12. **Oh Y-S, Kahng H-Y, Lee D-H, Lee SB.** 2012. *Tenacibaculum jejuense* sp. nov., isolated from  
776 coastal seawater. International Journal of Systematic and Evolutionary Microbiology **62**:414-  
777 419.
- 778 13. **Pineiro-Vidal M, Riaza A, Santos Y.** 2008. *Tenacibaculum discolor* sp. nov. and  
779 *Tenacibaculum gallaicum* sp. nov., isolated from sole (*Solea senegalensis*) and turbot (*Psetta*  
780 *maxima*) culture systems. International journal of systematic and evolutionary microbiology  
781 **58**:21-25.
- 782 14. **Xu Z-X, Yu P, Mu D-S, Liu Y, Du Z-J.** 2017. *Tenacibaculum agarivorans* sp. nov., an agar-  
783 degrading bacterium isolated from marine alga *Porphyra yezoensis* Ueda. International journal  
784 of systematic and evolutionary microbiology **67**:5139-5143.
- 785 15. **Suzuki M, Nakagawa Y, Harayama S, Yamamoto S.** 2001. Phylogenetic analysis and  
786 taxonomic study of marine *Cytophaga*-like bacteria: proposal for *Tenacibaculum* gen. nov. with  
787 *Tenacibaculum maritimum* comb. nov. and *Tenacibaculum ovolyticum* comb. nov., and  
788 description of *Tenacibaculum mesophilum* sp. nov. and *Tenacibaculum amylolyticum* sp. nov.  
789 Int J Syst Evol Microbiol **51**:1639-1652.
- 790 16. **Teramoto M, Zhai Z, Komatsu A, Shibayama K, Suzuki M.** 2016. Genome sequence of the  
791 psychrophilic bacterium *Tenacibaculum ovolyticum* strain da5A-8 isolated from deep seawater.  
792 Genome announcements **4**:e00644-00616.
- 793 17. **Avendaño-Herrera R, Magariños B, Toranzo AE, Beaz R, Romalde JL.** 2004. Species-  
794 specific polymerase chain reaction primer sets for the diagnosis of *Tenacibaculum maritimum*  
795 infection. Diseases of aquatic organisms **62**:75-83.

- 796 18. **Perez-Pascual D, Lunazzi A, Magdelenat G, Rouy Z, Roulet A, Lopez-Roques C,**  
797 **Larocque R, Barbeyron T, Gobet A, Michel G, Bernardet JF, Duchaud E.** 2017. The  
798 complete genome sequence of the fish pathogen *Tenacibaculum maritimum* provides insights  
799 into virulence mechanisms. *Front Microbiol* **8**:1542.
- 800 19. **Lasica AM, Ksiazek M, Madej M, Potempa J.** 2017. The Type IX Secretion System (T9SS):  
801 Highlights and Recent Insights into Its Structure and Function. *Frontiers in Cellular and*  
802 *Infection Microbiology* **7**.
- 803 20. **Hoffmann AR, Patterson AP, Diesel A, Lawhon SD, Ly HJ, Stephenson CE, Mansell J,**  
804 **Steiner JM, Dowd SE, Olivry T, Suchodolski JS.** 2014. The skin microbiome in healthy and  
805 allergic dogs. *PloS one* **9**:e83197.
- 806 21. **Kueneman JG, Parfrey LW, Woodhams DC, Archer HM, Knight R, McKenzie VJ.** 2014.  
807 The amphibian skin-associated microbiome across species, space and life history stages.  
808 *Molecular ecology* **23**:1238-1250.
- 809 22. **McFall-Ngai M, Hadfield MG, Bosch TC, Carey HV, Domazet-Lošo T, Douglas AE,**  
810 **Dubilier N, Eberl G, Fukami T, Gilbert SF, Hentschel U, King N, Kjelleberg S, Knoll AH,**  
811 **Kremer N, Mazmanian SK, Metcalf JL, Nealson K, Pierce NE, Rawls JF, Reid A, Ruby**  
812 **EG, Rumpho M, Sanders JG, Tautz D, Wernegreen JJ.** 2013. Animals in a bacterial world,  
813 a new imperative for the life sciences. *Proceedings of the National Academy of Sciences*  
814 **110**:3229-3236.
- 815 23. **Muegge BD, Kuczynski J, Knights D, Clemente JC, González A, Fontana L, Henrissat B,**  
816 **Knight R, Gordon JI.** 2011. Diet drives convergence in gut microbiome functions across  
817 mammalian phylogeny and within humans. *Science* **332**:970-974.
- 818 24. **Holmes I, Harris K, Quince C.** 2012. Dirichlet multinomial mixtures: generative models for  
819 microbial metagenomics. *PloS one* **7**:e30126.
- 820 25. **Goris J, Konstantinidis KT, Klappenbach JA, Coenye T, Vandamme P, Tiedje JM.** 2007.  
821 DNA–DNA hybridization values and their relationship to whole-genome sequence similarities.  
822 *International journal of systematic and evolutionary microbiology* **57**:81-91.

- 823 26. **Meier-Kolthoff JP, Auch AF, Klenk H-P, Göker M.** 2013. Genome sequence-based species  
824 delimitation with confidence intervals and improved distance functions. *BMC bioinformatics*  
825 **14:60.**
- 826 27. **Pérez-Pascual D, Lunazzi A, Magdelenat G, Rouy Z, Roulet A, Lopez-Roques C,**  
827 **Larocque R, Barbeyron T, Gobet A, Michel G, Bernardet J-F, Duchaud E.** 2017. The  
828 complete genome sequence of the fish pathogen *Tenacibaculum maritimum* provides insights  
829 into virulence mechanisms. *Frontiers in Microbiology* **8:1542.**
- 830 28. **Ploner A.** 2012. Heatplus: Heatmaps with row and/or column covariates and colored clusters.  
831 R package version **2.**
- 832 29. **Rudis B, Ross N, Garnier S.** 2016. The viridis color palettes. Website, February.
- 833 30. **Vestheim H, Jarman SN.** 2008. Blocking primers to enhance PCR amplification of rare  
834 sequences in mixed samples—a case study on prey DNA in Antarctic krill stomachs. *Frontiers*  
835 *in zoology* **5:12.**
- 836 31. **Nelson JS, Grande TC, Wilson MV.** 2016. *Fishes of the World.* John Wiley & Sons.
- 837 32. **Rawls JF, Mahowald MA, Ley RE, Gordon JI.** 2006. Reciprocal gut microbiota transplants  
838 from zebrafish and mice to germ-free recipients reveal host habitat selection. *Cell* **127:423-433.**
- 839 33. **Roeselers G, Mittge EK, Stephens WZ, Parichy DM, Cavanaugh CM, Guillemin K, Rawls**  
840 **JF.** 2011. Evidence for a core gut microbiota in the zebrafish. *The ISME journal* **5:1595.**
- 841 34. **Seedorf H, Griffin NW, Ridaura VK, Reyes A, Cheng J, Rey FE, Smith MI, Simon GM,**  
842 **Scheffrahn RH, Woebken D, Spormann AM, Van Treuren W, Ursell LK, Pirrung M,**  
843 **Robbins-Pianka A, Cantarel BL, Lombard V, Henrissat B, Knight R, Gordon JI.** 2014.  
844 Bacteria from diverse habitats colonize and compete in the mouse gut. *Cell* **159:253-266.**
- 845 35. **Dehler CE, Secombes CJ, Martin SA.** 2017. Environmental and physiological factors shape  
846 the gut microbiota of Atlantic salmon parr (*Salmo salar* L.). *Aquaculture* **467:149-157.**
- 847 36. **Miyake S, Ngugi DK, Stingl U.** 2015. Diet strongly influences the gut microbiota of  
848 surgeonfishes. *Molecular ecology* **24:656-672.**
- 849 37. **Barker H.** 1961. Fermentations of nitrogenous organic compounds, p 151-207. *In* Gunsalus  
850 IC, Stanier RY (ed), *The Bacteria*, vol 2. Academic Press, New York & London.

- 851 38. **Abdel-Aziz M, Eissa AE, Hanna M, Okada MA.** 2013. Identifying some pathogenic  
852 *Vibrio/Photobacterium* species during mass mortalities of cultured Gilthead seabream (*Sparus*  
853 *aurata*) and European seabass (*Dicentrarchus labrax*) from some Egyptian coastal provinces.  
854 International Journal of Veterinary Science and Medicine **1**:87-95.
- 855 39. **Lee K-K.** 1995. Pathogenesis studies on *Vibrio alginolyticus* in the grouper, *Epinephelus*  
856 *malabaricus*, Bloch et Schneider. Microbial Pathogenesis **19**:39-48.
- 857 40. **Romalde JL.** 2002. *Photobacterium damsela* subsp. piscicida: an integrated view of a  
858 bacterial fish pathogen. International Microbiology **5**:3-9.
- 859 41. **Smith CC, Snowberg LK, Caporaso JG, Knight R, Bolnick DI.** 2015. Dietary input of  
860 microbes and host genetic variation shape among-population differences in stickleback gut  
861 microbiota. The ISME journal **9**:2515.
- 862 42. **Bridel S, Olsen A-B, Nilsen H, Bernardet J-F, Achaz G, Avendaño-Herrera R, Duchaud**  
863 **E.** 2018. Comparative genomics of *Tenacibaculum dicentrarchi* and “*Tenacibaculum*  
864 *finnmarkense*” highlights intricate evolution of fish-pathogenic species. Genome biology and  
865 evolution **10**:452-457.
- 866 43. **Frisch K, Småge S, Vallestad C, Duesund H, Brevik ØJ, Klevan A, Olsen R, Sjaatil S,**  
867 **Gauthier D, Brudeseth B, Nylund A.** 2018. Experimental induction of mouthrot in Atlantic  
868 salmon smolts using *Tenacibaculum maritimum* from Western Canada. Journal of fish diseases.
- 869 44. **Frisch K, Småge SB, Brevik ØJ, Duesund H, Nylund A.** 2018. Genotyping of  
870 *Tenacibaculum maritimum* isolates from farmed Atlantic salmon in Western Canada. Journal  
871 of fish diseases **41**:131-137.
- 872 45. **Mabrok M, Machado M, Serra C, Afonso A, Valente L, Costas B.** 2016. Tenacibaculosis  
873 induction in the Senegalese sole (*Solea senegalensis*) and studies of *Tenacibaculum maritimum*  
874 survival against host mucus and plasma. Journal of fish diseases **39**:1445-1455.
- 875 46. **Småge SB, Brevik ØJ, Duesund H, Ottem KF, Watanabe K, Nylund A.** 2016.  
876 *Tenacibaculum finnmarkense* sp. nov., a fish pathogenic bacterium of the family  
877 Flavobacteriaceae isolated from Atlantic salmon. Antonie van Leeuwenhoek **109**:273-285.

- 878 47. **Miyake S, Ngugi DK, Stingl U.** 2016. Phylogenetic diversity, distribution, and cophylogeny  
879 of giant bacteria (*Epulopiscium*) with their surgeonfish hosts in the Red Sea. *Frontiers in*  
880 *microbiology* **7**:285.
- 881 48. **Ngugi DK, Miyake S, Cahill M, Vinu M, Hackmann TJ, Blom J, Tietbohl MD, Berumen**  
882 **ML, Stingl U.** 2017. Genomic diversification of giant enteric symbionts reflects host dietary  
883 lifestyles. *Proceedings of the National Academy of Sciences* **114**:E7592-E7601.
- 884 49. **Stecher B, Chaffron S, Käppeli R, Hapfelmeier S, Friedrich S, Weber TC, Kirundi J,**  
885 **Suar M, McCoy KD, von Mering C.** 2010. Like will to like: abundances of closely related  
886 species can predict susceptibility to intestinal colonization by pathogenic and commensal  
887 bacteria. *PLoS pathogens* **6**:e1000711.
- 888 50. **Rius A, Kittelmann S, Macdonald K, Waghorn G, Janssen P, Sikkema E.** 2012. Nitrogen  
889 metabolism and rumen microbial enumeration in lactating cows with divergent residual feed  
890 intake fed high-digestibility pasture. *Journal of dairy science* **95**:5024-5034.
- 891 51. **Thompson LR, Sanders JG, McDonald D, Amir A, Ladau J, Locey KJ, Prill RJ, Tripathi**  
892 **A, Gibbons SM, Ackermann G, Navas-Molina JA, Janssen S, Kopylova E, Vázquez-Baeza**  
893 **Y, González A, Morton JT, Mirarab S, Xu ZZ, Jiang L, Haroon MF, Kanbar J, Zhu Q,**  
894 **Song SJ, Kosciulek T, Bokulich NA, Lefler J, Brislawn CJ, Humphrey G, Owens SM,**  
895 **Hampton-Marcell J, Berg-Lyons D, McKenzie V, Fierer N, Fuhrman JA, Clauzet A,**  
896 **Stevens RL, Shade A, Pollard KS, Goodwin KD, Jansson JK, Gilbert JA, Knight R,**  
897 **Consortium TEMP.** 2017. A communal catalogue reveals Earth's multiscale microbial  
898 diversity. *Nature* **551**.
- 899 52. **Fadrosh DW, Ma B, Gajer P, Sengamalay N, Ott S, Brotman RM, Ravel J.** 2014. An  
900 improved dual-indexing approach for multiplexed 16S rRNA gene sequencing on the Illumina  
901 MiSeq platform. *Microbiome* **2**:6.
- 902 53. **Schloss PD, Westcott SL, Ryabin T, Hall JR, Hartmann M, Hollister EB, Lesniewski RA,**  
903 **Oakley BB, Parks DH, Robinson CJ, Sahl JW, Stres B, Thallinger GG, Van Horn DJ,**  
904 **Weber CF.** 2009. Introducing mothur: open-source, platform-independent, community-

- 905 supported software for describing and comparing microbial communities. *Applied and*  
906 *environmental microbiology* **75**:7537-7541.
- 907 54. **Kozich JJ, Westcott SL, Baxter NT, Highlander SK, Schloss PD.** 2013. Development of a  
908 dual-index sequencing strategy and curation pipeline for analyzing amplicon sequence data on  
909 the MiSeq Illumina sequencing platform. *Applied and environmental microbiology:AEM.*  
910 01043-01013.
- 911 55. **Paradis E, Schliep K, Schwartz R.** 2018. ape 5.0: an environment for modern phylogenetics  
912 and evolutionary analyses in R. *Bioinformatics* **1**:3.
- 913 56. **Wickham H, Francois R, Henry L, Müller K.** 2015. dplyr: A grammar of data manipulation.  
914 R package version 04 **3**.
- 915 57. **de Vries A, Ripley B.** 2013. Ggdendro: tools for extracting dendrogram and tree diagram plot  
916 data for use with ggplot. R package version 01-12, Retrieved from [http://CRAN](http://CRAN.R-project.org/package=ggdendro)  
917 [R-project](http://CRAN.R-project.org/package=ggdendro)  
918 [org/package=ggdendro](http://CRAN.R-project.org/package=ggdendro).
- 918 58. **Wickham H.** 2016. ggplot2: elegant graphics for data analysis. Springer.
- 919 59. **Kassambara A.** 2017. ggpubr:“ggplot2” based publication ready plots. R package version 01  
920 **6**.
- 921 60. **Warnes GR, Bolker B, Bonebakker L, Gentleman R, Huber W, Liaw A, Lumley T,**  
922 **Maechler M, Magnusson A, Moeller S, Schwartz M.** 2009. gplots: Various R programming  
923 tools for plotting data. R package version **2**:1.
- 924 61. **Murrell P.** 2016. R graphics. CRC Press.
- 925 62. **Auguie B.** 2012. gridExtra: functions in Grid graphics. R package version 09 **1**.
- 926 63. **Kolde R.** 2012. Pheatmap: pretty heatmaps. R package version **61**.
- 927 64. **McMurdie PJ, Holmes S.** 2013. phyloseq: an R package for reproducible interactive analysis  
928 and graphics of microbiome census data. *PloS one* **8**:e61217.
- 929 65. **Neuwirth E.** 2011. Package ‘RColorBrewer’. CRAN 2011-06-17 08: 34: 00. Apache License  
930 2.0,
- 931 66. **Wickham H.** 2012. reshape2: Flexibly Reshape Data: A Reboot of the Reshape Package. R  
932 Package Version 1.

- 933 67. **Maechler M.** 2012. sfsmisc: Utilities from seminar fuer Statistik ETH Zurich. R package  
934 version:1.0-20.
- 935 68. **Oksanen J, Blanchet FG, Kindt R, Legendre P, O'hara R, Simpson GL, Solymos P,**  
936 **Stevens MHH, Wagner H.** 2010. vegan: Community Ecology Package. R package version  
937 1.17-2. [http://cran](http://cran.r-project.org) r-project org> Acesso em **23:2010**.
- 938 69. **Kruskal WH, Wallis WA.** 1952. Use of ranks in one-criterion variance analysis. Journal of  
939 the American statistical Association **47:583-621**.
- 940 70. **Clarke KR.** 1993. Non-parametric multivariate analyses of changes in community structure.  
941 Australian journal of ecology **18:117-143**.
- 942 71. **Segata N, Izard J, Waldron L, Gevers D, Miropolsky L, Garrett WS, Huttenhower C.**  
943 2011. Metagenomic biomarker discovery and explanation. Genome biology **12:R60**.
- 944 72. **Kester DR, Duedall IW, Connors DN, Pytkowicz RM.** 1967. Preparation of artificial  
945 seawater 1. Limnology and oceanography **12:176-179**.
- 946 73. **Clarke PH, Cowan S.** 1952. Biochemical methods for bacteriology. Microbiology **6:187-197**.
- 947 74. **Gordon J, McLeod J.** 1928. The practical application of the direct oxidase reaction in  
948 bacteriology. The Journal of Pathology and Bacteriology **31:185-190**.
- 949 75. **Sambrook J, Fritsch EF, Maniatis T.** 1989. Molecular cloning: a laboratory manual. Cold  
950 spring harbor laboratory press.
- 951 76. **Walker BJ, Abeel T, Shea T, Priest M, Abouelliel A, Sakthikumar S, Cuomo CA, Zeng Q,**  
952 **Wortman J, Young SK, Earl AM.** 2014. Pilon: an integrated tool for comprehensive  
953 microbial variant detection and genome assembly improvement. PloS one **9:e112963**.
- 954 77. **Lagesen K, Hallin P, Rødland EA, Stærfeldt H-H, Rognes T, Ussery DW.** 2007.  
955 RNAmmer: consistent and rapid annotation of ribosomal RNA genes. Nucleic Acids Research  
956 **35:3100-3108**.
- 957 78. **Parks DH, Imelfort M, Skennerton CT, Hugenholtz P, Tyson GW.** 2015. CheckM:  
958 assessing the quality of microbial genomes recovered from isolates, single cells, and  
959 metagenomes. Genome research:gr. 186072.186114.

- 960 79. **Aziz RK, Bartels D, Best AA, DeJongh M, Disz T, Edwards RA, Formsma K, Gerdes S,**  
961 **Glass EM, Kubal M, Meyer F, Olsen GJ, Olson R, Osterman AL, Overbeek RA, McNeil**  
962 **LK, Paarmann D, Paczian T, Parrello B, Pusch GD, Reich C, Stevens R, Vassieva O,**  
963 **Vonstein V, Wilke A, Zagnitko O.** 2008. The RAST Server: Rapid Annotations using  
964 Subsystems Technology. *BMC Genomics* **9**:75.
- 965 80. **Brettin T, Davis JJ, Disz T, Edwards RA, Gerdes S, Olsen GJ, Olson R, Overbeek R,**  
966 **Parrello B, Pusch GD, Shukla M, Thomason III JA, Stevens R, Vonstein V, Wattam AR,**  
967 **Xia F.** 2015. RASTtk: a modular and extensible implementation of the RAST algorithm for  
968 building custom annotation pipelines and annotating batches of genomes. *Scientific reports*  
969 **5**:8365.
- 970 81. **Pruesse E, Peplies J, Glöckner FO.** 2012. SINA: accurate high-throughput multiple sequence  
971 alignment of ribosomal RNA genes. *Bioinformatics* **28**:1823-1829.
- 972 82. **Stamatakis A.** 2006. RAxML-VI-HPC: maximum likelihood-based phylogenetic analyses  
973 with thousands of taxa and mixed models. *Bioinformatics* **22**:2688-2690.
- 974 83. **Ludwig W, Strunk O, Westram R, Richter L, Meier H, Yadhukumar, Buchner A, Lai T,**  
975 **Steppi S, Jobb G, Foerster W, Brettske I, Gerber S, Ginhart AW, Gross O, Grumann S,**  
976 **Hermann S, Jost R, König A, Liss T, Lüßmann R, May M, Nonhoff B, Reichel B, Strehlow**  
977 **R, Stamatakis A, Stuckmann N, Vilbig A, Lenke M, Ludwig T, Bode A, Schleifer KH.**  
978 2004. ARB: a software environment for sequence data. *Nucleic acids research* **32**:1363-1371.
- 979 84. **Rodriguez-R LM, Konstantinidis KT.** 2016. The enveomics collection: a toolbox for  
980 specialized analyses of microbial genomes and metagenomes. *PeerJ Preprints*,
- 981 85. **Wattam AR, Davis JJ, Assaf R, Boisvert S, Brettin T, Bun C, Conrad N, Dietrich EM,**  
982 **Disz T, Gabbard JL, Gerdes S, Henry CS, Kenyon RW, Machi D, Mao C, Nordberg EK,**  
983 **Olsen GJ, Murphy-Olson DE, Olson R, Overbeek R, Parrello B, Pusch GD, Shukla M,**  
984 **Vonstein V, Warren A, Xia F, Yoo H, Stevens RL.** 2017. Improvements to PATRIC, the all-  
985 bacterial Bioinformatics Database and Analysis Resource Center. *Nucleic Acids Research*  
986 **45**:D535-D542.



- 987 86. **Zhang H, Yohe T, Huang L, Entwistle S, Wu P, Yang Z, Busk PK, Xu Y, Yin Y.** 2018.  
988 dbCAN2: a meta server for automated carbohydrate-active enzyme annotation. *Nucleic Acids*  
989 *Research* **46**:W95-W101.
- 990 87. **Lombard V, Golaconda Ramulu H, Drula E, Coutinho PM, Henrissat B.** 2014. The  
991 carbohydrate-active enzymes database (CAZy) in 2013. *Nucleic Acids Research* **42**:D490-  
992 D495.
- 993 88. **Finn RD, Clements J, Eddy SR.** 2011. HMMER web server: interactive sequence similarity  
994 searching. *Nucleic acids research* **39**:W29-W37.
- 995 89. **Buchfink B, Xie C, Huson DH.** 2014. Fast and sensitive protein alignment using DIAMOND.  
996 *Nature methods* **12**:59.
- 997 90. **Busk PK, Pilgaard B, Lezyk MJ, Meyer AS, Lange L.** 2017. Homology to peptide pattern  
998 for annotation of carbohydrate-active enzymes and prediction of function. *BMC bioinformatics*  
999 **18**:214.
- 1000 91. **Bertelli C, Laird MR, Williams KP, Group SFURC, Lau BY, Hoad G, Winsor GL,**  
1001 **Brinkman FS.** 2017. IslandViewer 4: expanded prediction of genomic islands for larger-scale  
1002 datasets. *Nucleic acids research* **45**:W30-W35.
- 1003 92. **Kearse M, Moir R, Wilson A, Stones-Havas S, Cheung M, Sturrock S, Buxton S, Cooper**  
1004 **A, Markowitz S, Duran C, Thierer T, Ashton B, Meintjes P, Drummond A.** 2012. Geneious  
1005 Basic: an integrated and extendable desktop software platform for the organization and analysis  
1006 of sequence data. *Bioinformatics* **28**:1647-1649.
- 1007 93. **Alikhan N-F, Petty NK, Ben Zakour NL, Beatson SA.** 2011. BLAST Ring Image Generator  
1008 (BRIG): simple prokaryote genome comparisons. *BMC Genomics* **12**:402.
- 1009 94. **Wang Y, Coleman-Derr D, Chen G, Gu YQ.** 2015. OrthoVenn: a web server for genome  
1010 wide comparison and annotation of orthologous clusters across multiple species. *Nucleic Acids*  
1011 *Research* **43**:W78-W84.

1012

1013

1014

1015

1016

1017

1018

1019

1020

1021

1022

1023

1024

1025

1026

1027

1028

1029

1030

1031

1032

1033

1034 **Figures**

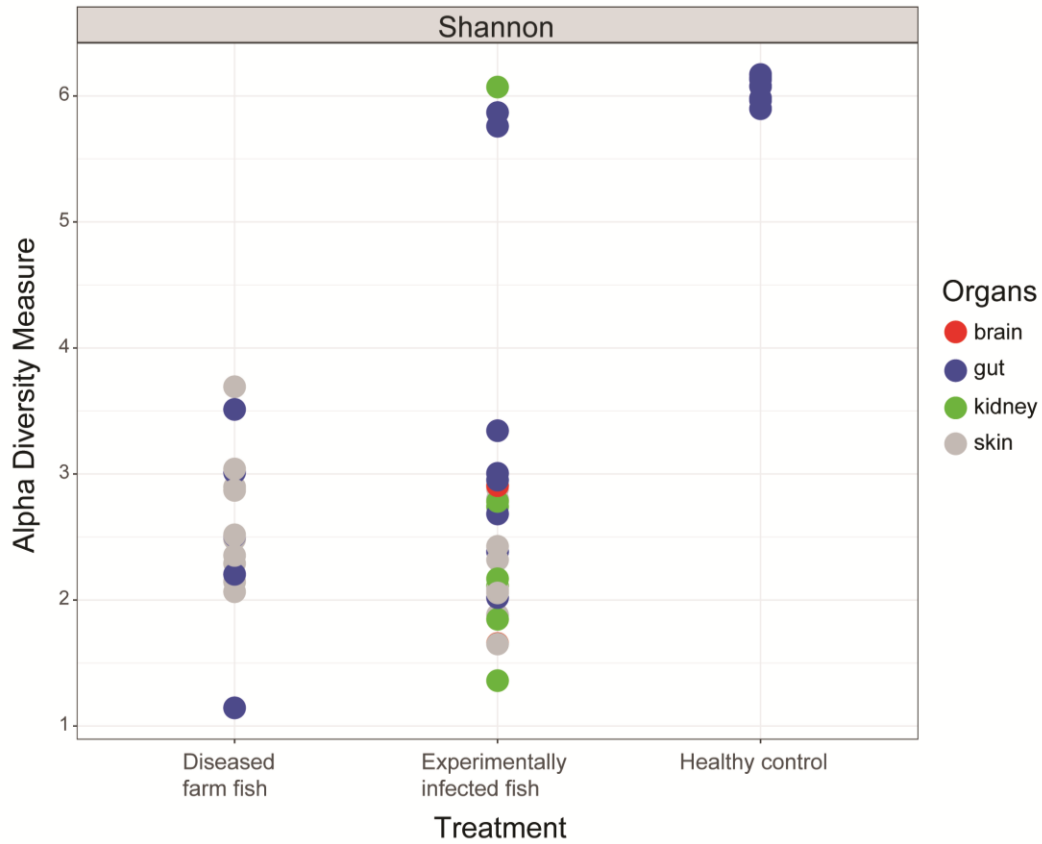

1035

1036 **Figure 1.** Comparative alpha-diversity analysis of healthy and infected fish. Shannon Index of  
1037 'diseased farm fish', 'experimentally infected' and 'healthy control' fish microbiota from  
1038 various tissue types. Coloration indicates the four different tissue types (brain, gut, kidney and  
1039 skin) from which microbiota was analysed.

1040

1041

1042

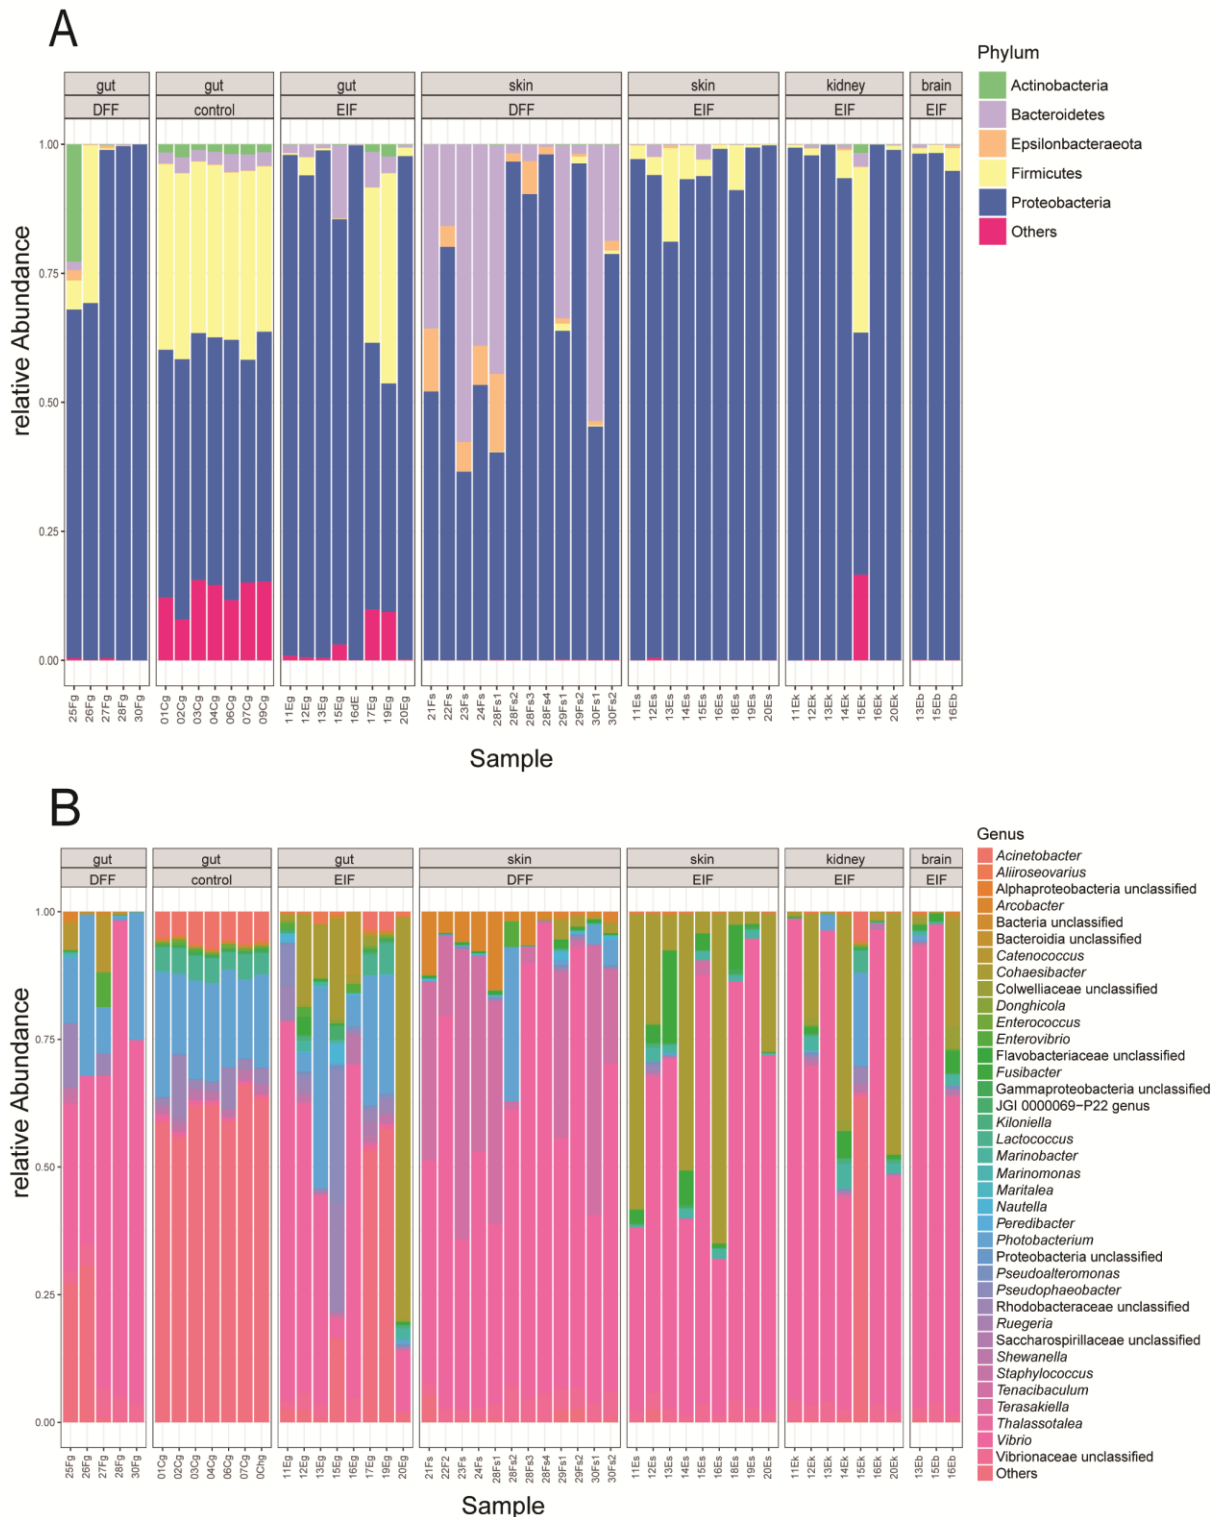

1043

1044 **Figure 2.** Taxonomic composition of healthy, diseased and experimentally infected fish at  
 1045 different taxonomic levels. A) Phylum-level taxonomy composition of fish microbiota, split by  
 1046 different organ types and condition ('control', 'healthy' and 'diseased'). B) Genus-level  
 1047 taxonomy composition of fish microbiota, split by different organ types and condition

1048 ('control', healthy and diseased). Genera that have a relative abundance of less than 0.01%  
1049 across all samples are classified as others. Labels: DFF – diseased farm fish; EIF –  
1050 experimentally infected fish.

1051

1052

1053

1054

1055

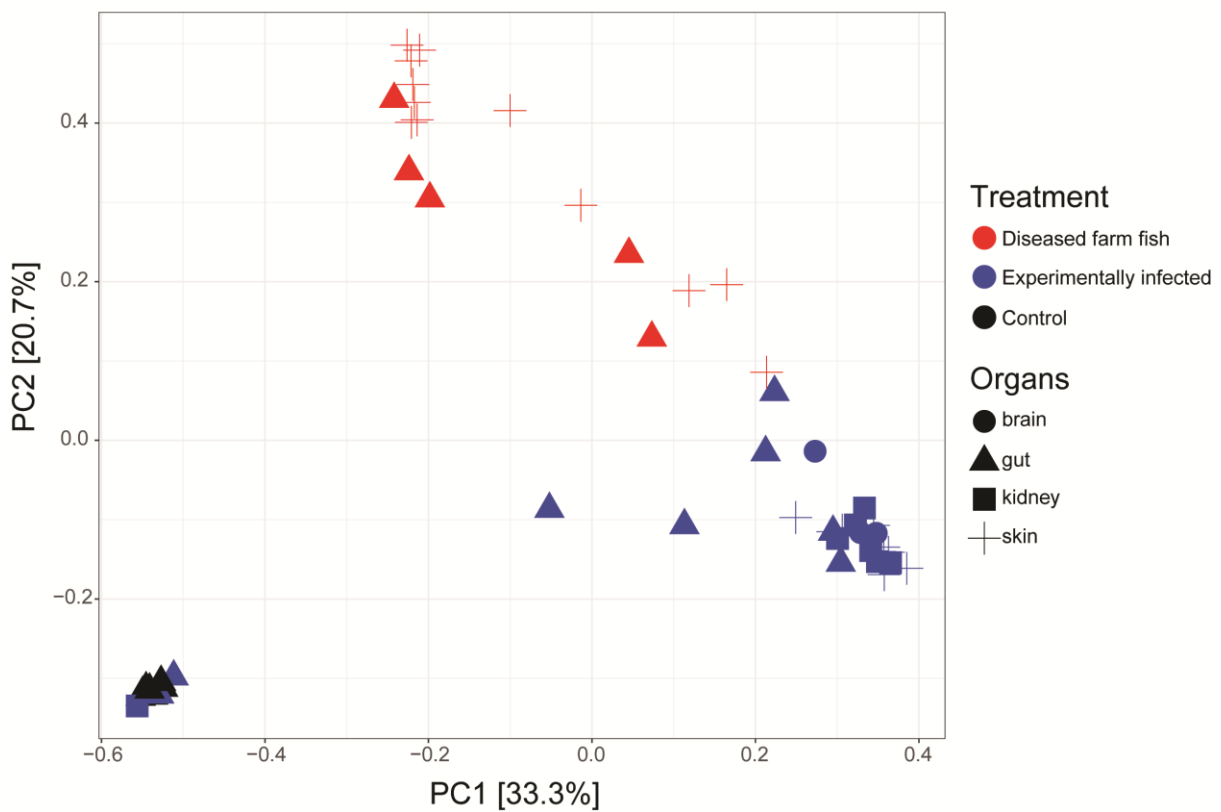

1056

1057 **Figure 3.** Effects of tenacibaculosis infection on the fish microbiota community structure.

1058 Principal coordinate analysis (PCoA) based on Bray-Curtis dissimilarity distances is shown.

1059

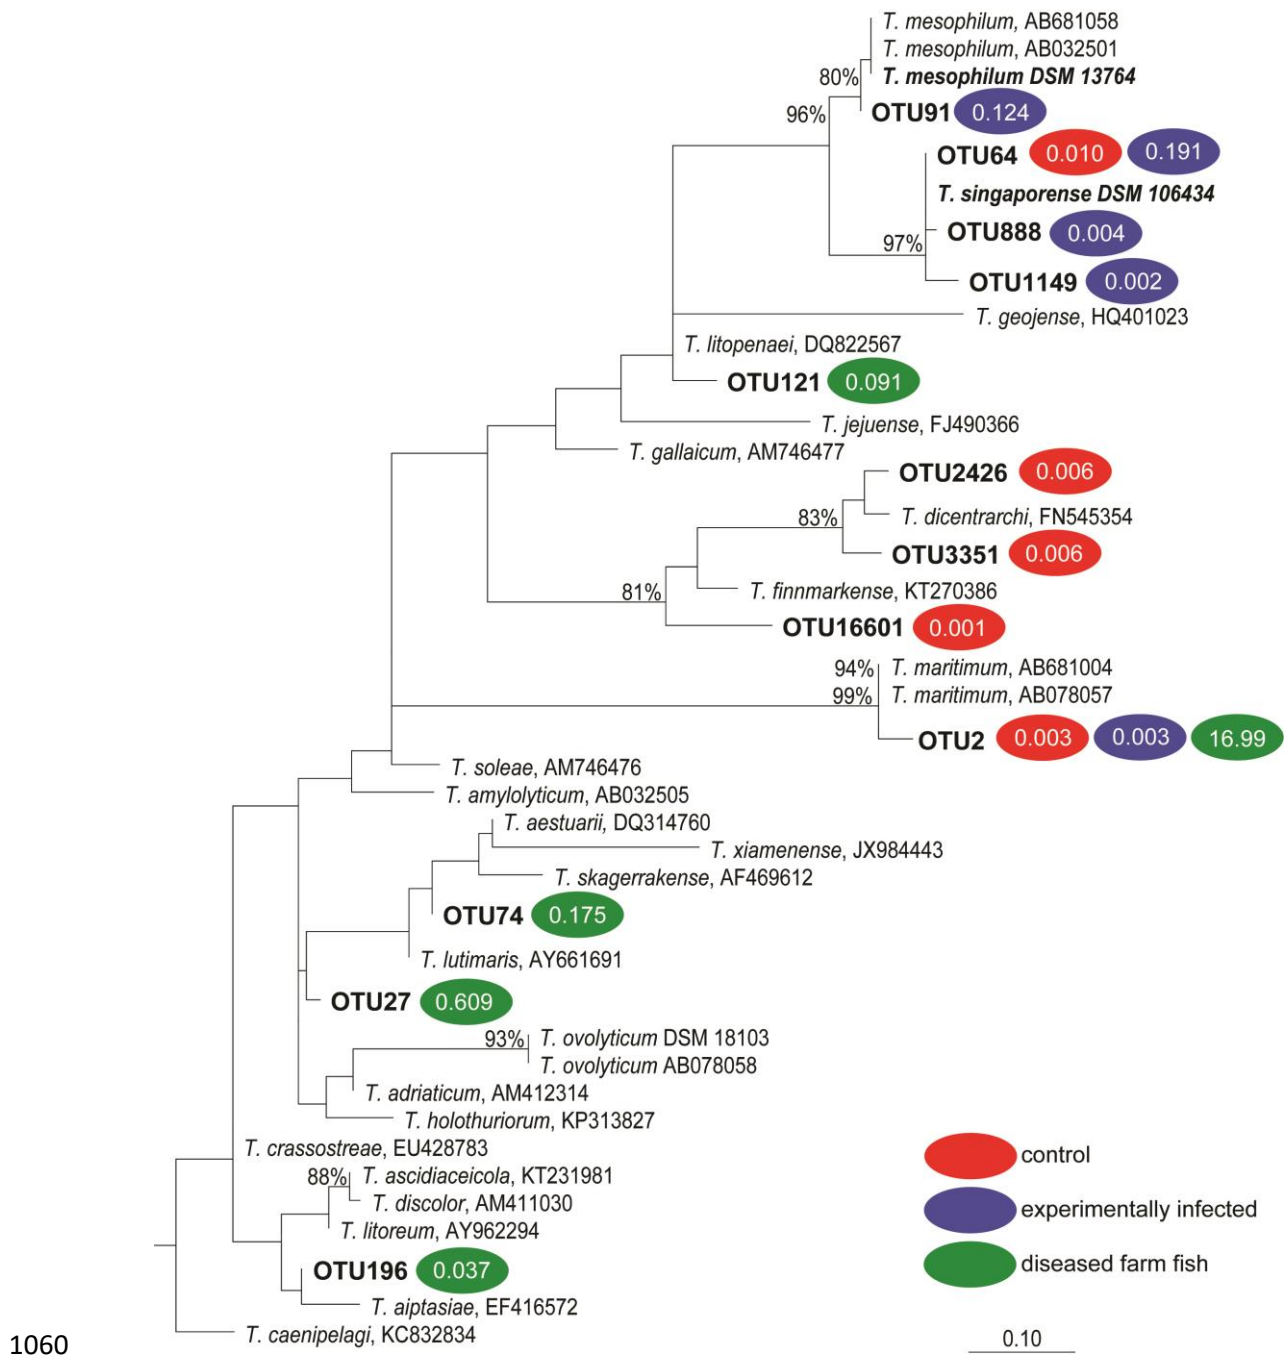

1060

1061 **Figure 4.** RaxML 16S rRNA gene phylogeny of major *Tenacibaculum* OTUs. The sequences  
 1062 were SINA-aligned (Pruesse et al., 2012) and the tree was constructed in ARB. *T. singaporense*  
 1063 in bold was isolated in this study. The coloured semi-circle denotes the top five most abundant  
 1064 *Tenacibaculum* OTUs from negative control (red), experimentally infected fish (blue) and  
 1065 diseased farm fish (green) with relative abundance noted inside. Bootstrap values >70% are  
 1066 indicated.

1067

1068

1069

1070

1071

1072

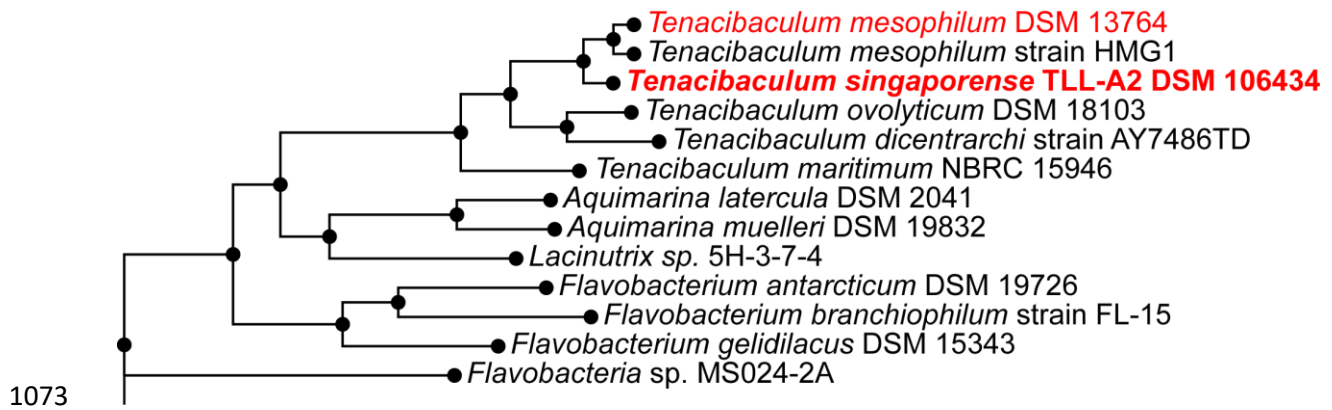

1074 **Figure 5.** Whole-genome phylogeny of major *Tenacibaculum* genomes. The tree was  
1075 constructed in PATRIC with RaxML algorithm. Those in red are isolates collected for this  
1076 study.

1077

1078

1079

1080

1081

1082

1083

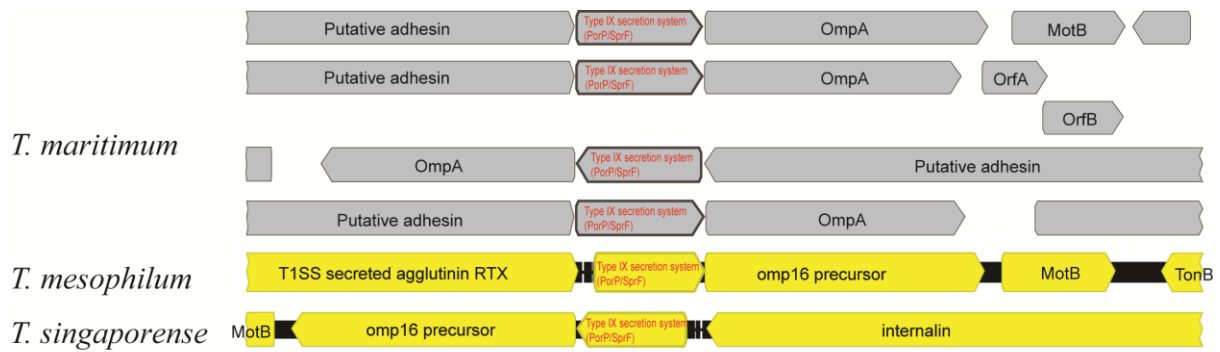

1084

1085

1086 **Figure 6.** PorP gene (type IX secretion system) and its genomic region annotated in *T.*  
1087 *maritimum*, *T. mesophilum*, and *T. singaporense* genomes. Four PorP genes were described  
1088 earlier from the *T. maritimum* genome, while only one was found in *T. mesophilum* and *T.*  
1089 *singaporense* genomes each.

1090

1091

1092

1093

1094

1095

1096

1097

1098



A

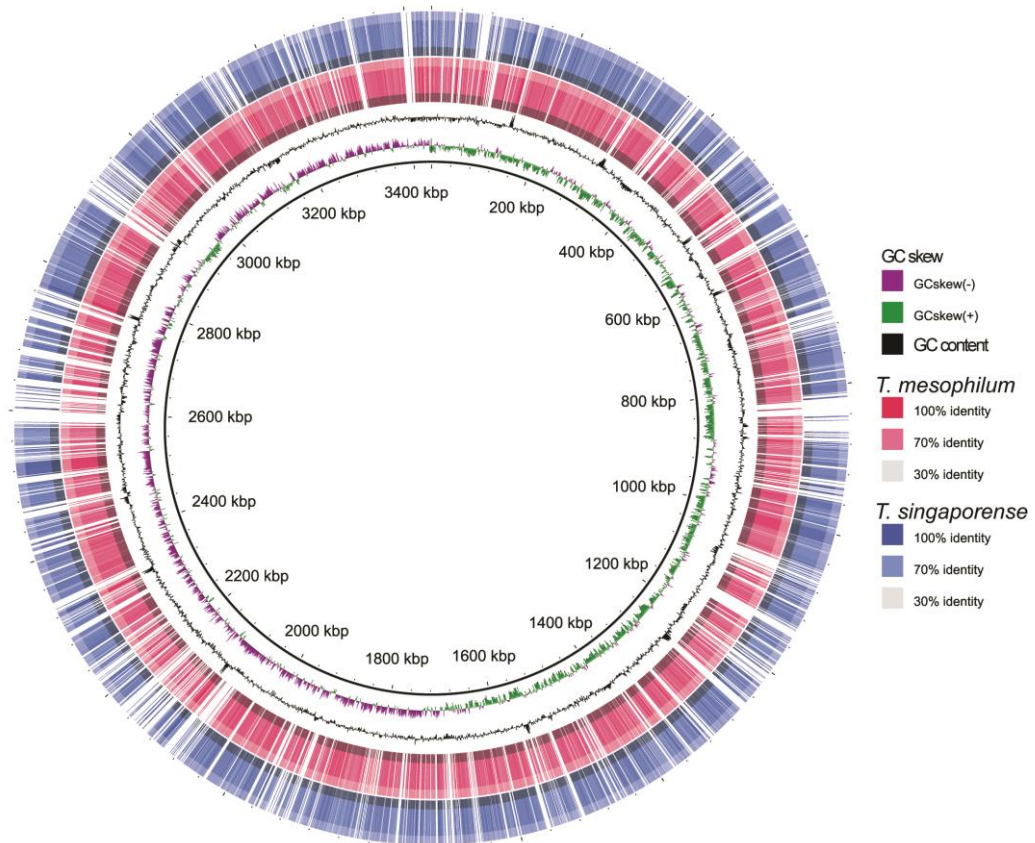

B

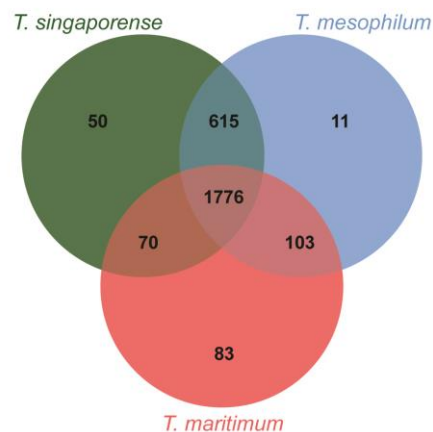

1099

1100 **Figure 7.** Comparative genome analyses of *Tenacibaculum* species. A) Comparison of *T.*  
1101 *singaporense* DSM 106434 and *T. mesophilum* DSM 13764 with *T. maritimum* DSM 17995.  
1102 BRIG Circular display diagram depicting GC skew, GC content, similarity of *T. mesophilum*  
1103 (red) and *T. singaporense* (blue) relative to *T. maritimum*. B) Venn diagram of orthologous  
1104 clusters between *T. singaporense* DSM 106434 isolated in this study, *T. mesophilum* DSM  
1105 13764, closest known relative, and *T. maritimum* NCIMB 2154T, prominent tenacibaculosis  
1106 disease agent.
